# Supplementary material for: Aberrant association of chromatin with nuclear periphery induced by Rif1 leads to mitotic defect
Source: Life Sci Alliance. 2023 Feb 7;6(4):e202201603. doi: 10.26508/lsa.202201603 (PMC9909590; doi:10.26508/lsa.202201603)
Supplement: Supplementary file 21 [file LSA-2022-01603_TableS2.xlsx]

## Sheet: Table5_Rif1BS_peaks_MS733
Table 5
chr	start	end	length	abs_summit	pileup	–LOG10(pvalue)	fold_enrichment	–LOG10(qvalue)	Sequence (300bp) around abs_summit
I	11066	11354	289	11198	201	33.4908	2.67568	30.572	AAATAAAAAAATAAATATAATGATAAAGATAATTTGAACCCCTGTACAGGAACTTCATATTGTTTGAGTAATAATTGGATGCCTTATCTGCGACCACGATTGCAGCCTCGAAAACCGCCTCTGTAGTCTCTTCTGCAACAAATCAAAAAAGGGAAATAAGTAGAATTGTTTTCAATATGGTTATTTATATCAATTGATTATGTGAATGATTTTTTTATCAAAGAAAATCTTAATTCCACATCGTGCAAACTCTTGTCTAAGTTAGTGTCCCTCGATGATGAATGCGCACAACATGTATGT
I	12041	12944	904	12360	181	18.7036	2.08636	16.4182	CAACTGCTTTTTATGTTACGTGGCAAGGCAGACTCATTTGTGCTGGTGTAGGGCTCATACTTGAACAGGCTTATGAGGGTGGTCAGATGTTTAACACATTGATGGCACATTGCTTTGAAACGTACAATGGTGTTGAGAAAAGTGGAACGCAGTGTGTGGCCGATTGGCTTAAAGTAGGGCTTTTGGCTGTCACATTTGGGGCTGGAGGACCTAGATTGGTTAACACATTAGGTGGTACTTTTCTCACTTCTCCTACTGCAAAACGGAGCAATCTATATTGTGATGATTTTACTGGTGCTG
I	149637	149870	234	149722	120	12.6045	2.06243	10.5747	AATGATCCAACACTTAAAACAGGCTCTGCTGGTAGACAATATAAAATACATTTTAAGTATTTATAGAGCTATTTACTGATCCAAATGTCTACGGCCATACCTAGGCGAAAACACCAGTTCCCGTCCGATCACTGCAGTTAAGCGTCTGAGGGCCTCGTTAGTACTATGGTTGGAGACAACATGGGAATCCGGGGTGCTGTAGGCTCCTTCTTTTTTGATTTTATATCATTTTTTTGTGAACTGGTTGTTTAATTAGCAAAACTTCAATAGAAGCATTGTTCTAAAGTTGTTGAAGCAGTA
I	304122	304492	371	304262	133	19.0136	2.41069	16.716	AATAGTATAAATAATATTATATTATGTTTGAGCTTTAAATTGTTATATAGAAGACTTAGAATGCTAAAAGAAATCCATTTCTCACTCGCCAAGTAGGATCAGTTTCCTCCTATGACTTGCTAAAGCCCCCACGTGGTACTGCAATCGATTTTAATTCTAATGCTTAGCCAAGTCTAAAATAGTTGAAATTCTTAGTGGGATAAGAACTCTTAACCCCCACGATATATTTGAATGCTAAATAACCTAACCTAAAACCATTTTACACATTTTATTACTAACTTCATTATATTCTTGTAGAGG
I	339160	339435	276	339252	123	12.5514	2.03902	10.5246	CTACGAAATCAGTGTATGGAGCAAAAAAGTATACAACATTTTTAAATTCAGCTCATATTGTACATTACTGTACACTGTATCTTTTATATATGGTACGACATAGAATAGAAAAAAGTGAAAGAGACGGCAACAACATCAGTGACGGCGCGCTTTTTCTTAAAATGTTACAAAAACTGGAGTAATTCATGTAAGGCTGTGAAATTGGCATGAGCTCGTCGAGAGCTTTCTTCAACTACTAGGCTCATTTAAAATTTACACCGCACCAATGTTTCTTTATTACTTACAATTGCCTCTCATCAT
I	455184	455978	795	455607	320	111.557	4.80103	106.48	GGATGGGGTATAAGGAAGTTTAGGCACTCTACTCTATCATGAGTAAGTTGCAGCCCCACTTTTTTTTACCAGTTCCAAGTGGGGGATGCGATTCGAGGAAGATGCACCAAGTAGGAGACTGTAGATATAGAAGGGATGGTTCTAAAGTGGGTGAATAAAGTCTACGTGGGGGTGAGAAATCTTTCAAGTTCAGCAAGTTGGTCCCTTGGCAAGGGAGTAGTAGTATATGGATAAATTTCCCCCCACATAGGGTCTCAGAGTAAGTTTGCTCCTCTATTCTTAATAGCTTGTTTATGTCAA
I	456487	456692	206	456561	131	12.8972	2.0142	10.8535	TGCTCATGTAAATATACTCCAAAGTTCAGGAATTTTGCAAGCCTGAATTTAAAATATTAACTAACTAAAATTAAAATTTCTTTTTCCTATAAATTCTATATTTTACTTAACGTGCTGTCTACGGCCATACCTAGGTGAAAACACCAGTTCCCGTCCGATCACTGCAGTTAAGCGTCTGAGGGCCTCGTTAGTACTATGGTTGGAGACAACATGGGAATCCGGGGTGCTGTAGGTTCCTTTTATTTTTTTTCTCATTTTTTAGCTCAGTCATTAACATTGATCATTGCAAAATCCGTAATA
I	897915	898863	949	898464	181	19.7779	2.13923	17.4497	GACAAGAACATTTTGGAGAGGGAAAATACTGCCAGTAGCTCTTTCAATTTCACGGCCAATGACCTCAGGAATGAGCTTTTGAACGAGTTCCCTCATGGAGCAAGAAGAAGTTTGGTTTTGGATAACTTGGAACATCTTCTGGCGGATGGCACGGATTTGAGAAGATTGAGCATAAGTAGTCTTCTTAACTTGGTTAGCACGACGACGTGTGAAGCCAATGACAAAGACACGGCAAAGATAACCATCAGTAGTCTTGATAGTTTGATCAGCCTCGATGGTTGTTTGCCATTTGCGGACAAG
I	934082	934783	702	934244	132	17.7194	2.33122	15.4744	TTATCAAAAAACAAAGAGGTGGCTTATACACTTCGGTTAGTGAGAGGTAGATAGGGCAGATCGGAAAGGACATCACTGTGGCGGGAAGAATCTCTTACACTTACTATGTGGGGGAATAGTACTACGGGGGCTCGCTATTCAACAAGTACAACGAGGTTGGACATGAATGTTTGATATCGAGCAAGTGGGTATATATTAGTCGAAAATAATCAACTTTACGATACAAGATCTAATCTTAAAACTATTATAAGTAAATGAGATGAAAAATTAAATAAGAAAGATAAAAAATTGAAAAAAGAA
I	958968	959607	640	959340	158	22.4265	2.42101	20.0115	CCTCTCTTTCAGTGGGTTTAGCAACTGAAAAAATTTAAATAAACTGCTTACTTTCAACGATAACAATATTATCTTCACCACACACTATCAATGTACGAAGTTAAATATTTTCAAACCTCACATCCTAAACCATCCAATGTTGTCAAATTCATGCGTCACAAATCTGTCAACAGAAGAAGATTCGGCGTCGCTTGCCAGTAGTGCAATAGCAAGAACACCAGTGTCGGAAAGCATAGCAAGCCAGAGGCTTTCCAACTCAAACCAAAAACAAGATTAATCGGAAACACCTCAGTGAGGTGA
I	987238	987987	750	987837	145	14.5223	2.03901	12.4023	AATTAAACACGTCAGAAAACACCAGCTGCCCTACATAATACGACCAAAAGGAAACATATCATGTAAGAGATCATCGCATAGAAAGACAGCAAAACAATTAGGTAAAAAACCTAATCGAAAAGCATGCCTTCAAAGAATTAAAAGTCCTCACTCTGAGGGCAACGGTGCCTCCTATCATCATCCGTGTTGAGTTCTGTGGCTAGGTTAGGAAACCCAAGCCGGACGTATACTATAGAAATGATCCTATGGAGTATCGTCGATAGTGTTTTGTTGAGGATAATGACCCGTATATATAGTAAA
I	1150046	1151208	1163	1150289	222	50.9613	3.31924	47.5815	TTGTCTCTGTGTTTGACTCCTTCAAGCGCTAGCGCTCGCTCTAGCGACGGCATAATTTTATTTCCACATCCGAGCTAAAAAACCTCGGATCAATTGATTTTCATCAAGGACCGATGTCATTTCAAACTGCGCCCAATAAATCACGTACTTTTAACCTTCGGAGCCTTACCTAACGAATCATCTAGGAATTCATCTTCCATTGCGTCATTCACGCACATCTAGACAAGATAAGGTGAAGACCACGAGTCGGGTATGTCTTCCGAATGTGCATGGCTCTGACAACAACATCAGATAAGTAAA
I	1183945	1185286	1342	1184661	177	18.1803	2.07904	15.9165	TGTCAAAGTCCTCACCACCGAGATGGGTATCACCTGAAGTAGCCAAAACTTCGAAAACACCATTGTCAATAGACAAAAGAGAAACGTCAAAAGTACCACCACCTAAATCATAAACAACAATATGCTTCTCTGTATCAGTTTTGTCTAATCCGTAGGCAATAGCAGCCGCAGTAGGCTCATTGACGATACGAATAACATTCAAGCCGGCAATAGTACCAGCATCCTTGGTAGCCTGACGCTGAGCGTCATTGAAGTAGGCGGGGACAGTAACAACAGCGTGAGTGACAGGCTTTCCGAGGT
I	1293802	1294437	636	1294138	255	81.879	4.40395	77.8762	AGATAATTGTTATGATACTTTTACAAGATTCTTTTTGTTTGAATAATTACTTTTTAGTTCCTTGCTGATTCCCTTACATCTTTGCTTCTTATTGCTACCTCTTTTACAGTTTTTTGTACCCCACATAGGACTTTTAACCCACATTTATTGCACTTGTAGTCAAGTAGCTAATGAATACTTAGGCCCCCACTCAGGCCTTTGGAGCCCACAAGAGCAACCTAGTGAATACCTGAATGCTATATAATATCGCAGAACATTCATCATTAAATTGATTTTAAAAATTTATTTACGTGGTACGTT
I	1511711	1512275	565	1512100	161	19.3947	2.2289	17.0819	GTTAAAACGAGGAGAAATAACTCCACATTTGTTGATACGGCCGTTCAGCTGAATAACGATTTTACCAGAACGATGGTCATCAATTTCTGTGAATTCGTCAATGTAGCCATGCTTTTGCATGACAGTTAAAAACTTGACGATAACTTTAGAGGAAGGACGGATGAGCACTTGGCGACGTCCACGGCGCTCGGCGTTGACGATATTGTTTAAACAATCAGCGAGAACAGATTGACGAACCATTTTGTGTTTCTGACGAGAAGCGCGTTAGTTTTCTTGAGTGTCTTGTTTAAAGATTTCAAG
I	1571523	1572019	497	1571798	156	18.7969	2.22614	16.508	TGTTAGATAAAAAGGGGGACAACGAGGTGCGCAATTTCGTTGCAATGTTTACTGTAAACAATGAGTAATTGTGTATTGCTGGTTGCTAGGCCACAACACCAACGAGGAGCTTGCGACCAAACTTTGAAGACCGTTTATTGGCTAAACTTGTACGTTTACGAGTAATTTGACTCTCGTTAAACACATTGGCATGACAACAAGGCGTTCGACTCTTTACAGATTGAGAATTGTAAACACTCAATGTAAACAATGCTGTATTTTCTGTCAAAACTTCATTTGTATTCCAGCTTTGGTTTTAAG
I	1599916	1600540	625	1600296	224	52.4764	3.37064	49.0549	GACAAATTATCCAAACATCGTAAAATCAAAATCACCTTTAGTTCAAAATCGCACACTCCCCCACTTGGTTTAGCTTCACTCTGAGCTCCTTAGATCTCATCAACTAGCATGTACCAATATCAGTACTGTGTGGGGGCATAATCTACGGTATAACGAACTACAGATTAACTACATCAATGCGATATGTGGGATAGAGTAGCTTCAGTGGGGGCGGTCCTACCTTTTAATTTTAGCAGCTTCCACGCAAGCAAGCGAAAAAAAATTAAACATAACGATTTGTAGCACTAACTTCATTATAAG
I	1951339	1952052	714	1951772	173	26.3329	2.52508	23.7427	AAAATTTATTATCAAATCGATGTACATACCCACTGCTCTTAACAAATAAGGGGATAGCCTTTCCTTTATATGGCCCCCACAAGGGACTTTATGAATATTGGATGCAGCTAGGAAATGTTAGGACAACCCCCACTCATGTTGATACAGCGATTTCGAGTAAACTGAGGGTAGCAGAACTAGTACTCGCAACCCCTATGCTCTCTCCCCCACATAGCCCCTTAAAAAAGATGGGAGATTGTTTTTAAAGACAAACACGAAACAACCCGAATGATGCGTCAAATTAGCTGGTTACCTATATGG
I	2106237	2106509	273	2106401	124	13.7084	2.1143	11.6261	ACTCCCATCTCTCACCGATTTCTGATTCGCAAAAATCACATGGGTTTTTTCATGGTGTGGTCCTTTTAACCAATCAGATTGTAGGACGGTTTCTCAAATGACCGAGAAATGATTCCATTCCGTTCCATAAGATTCTTTGTCCCGTTCGGAGTTCTTGAAATCCCGAGTTCGAATCTTGCATTCTAACTTTTTTCGTATGTTTGGCCATACTAAGACTACTAGCGCACGGCTGAAACCAATTGTGTAAACAAACATTTCTAACCTTGCTTAAACTGGATTGAACCTTTTTGTCAGTACATT
I	2106828	2107473	646	2106978	156	15.0107	2.01099	12.8694	CACCCCGCGATTTGCGTTGCGCCTGATAGCTTTAGCCAGTGGTGACGTAGGAGAAAGATAATTGGTCAGTCGCCCTCCATTGAAATTATCATCTAATCGTTCATCCGCCGCAATGTTGATTCACATCAAAACCCTAACCCTGAGGACAACGGTGACTTATACCAACATGTTTCCTCCTTCCCTCTGCAAACCACATTTTTCCTCGGTTCGACTCTTGAAATTGCTAGTCGCGCGGAAGAGTTCGATATCGTTATTAATCGTTAATTTGTTATAGGGCACTACTTTTTTGTCCCTTTGAAG
I	2144894	2145211	318	2145059	179	21.3669	2.22867	18.9857	CTTTTTACTGGGAAACCTTGGCTTCAAGAGAAGACGCCTCGCCTTCACCTTCATCCCACTTGGGACCTTAAAGCTTCCAAAAGTCTTGCTCGTTTCCCTTATACGCCACTTGAAAGTCTTTTGGCCCCCATTTCGGCCTTTCACCCCACTTACCTAAATAGCGCAGCCCCGTCGAAGGCTCAGAGCCATCCAGTATTGCTCGCCGCTGGAGTAGGTGGAATAGTAGTTAGATGCCCCAGTCGGAAACCGATATATCGTACCACTCGAATTCAGTATCTCTTGTTAATCTCCCACTTTACA
I	2326316	2326670	355	2326479	197	45.7019	3.33023	42.4711	GAGCTATTTTTGAGTTTTGAATCCTCTAGCCAAAAAGTAGTAACTACAGTCTACACGCTCTCTTACCTTGGCCGACGGGGTATGTACAATACCAACTCGAACGGTTCCCCACATGGTTCTCCAATGTGGGATACTTGGAATGGTATTCAGTAACGATCTAAAAGTCGCAATTCTAATATTCCACCCCCACTTTGTCTCATTGGGGTCCAAGTTTTTGGATGGGAATAAAAAGCGAAACGAGCTGTAACGCTTAGCGTTAGTGAAAATAGCGATTACCACTAGCAATCCTAAGAAAAAAAC
I	2405839	2406298	460	2406057	207	49.0492	3.38965	45.7242	ACAAACAAAATAAGAAAATCATCGGTTAAATTAATGACATTCAAAGTACCACTTTTCGTTCCTCTGACAAACGTTGCTACGCAACCTTGATTAGCCGTACTAGCAAACCCATCTTAGTACTTTGTGGGGGCTTTCATTTTAATAACCACTGCTAAGCTGCTAGTGTTAGGCATAAAACCGATAATAAGGACCATGTGGGGGTCTTCCGCATAGGTTAAACAAACAGCTGCTGAGGCGAGGTTCAGGTTATCGTGGTGCTTTTCTACGTTAATTTATCAATACAAAATAGTTTAATTTCCA
I	2663496	2664158	663	2663832	301	72.1759	3.46198	68.3343	TAACTTTACCAGTAACCCCACACATCCATCATGATGCCCAGACAGGTGGGATGGGTATCTAGGAATGAAAGGCAATGTGGGGGGATAGTGGGCATCCCTTTTCAAACCATCACTTATGACTTGGGAAGAGCAACAGTGGAGAAAATAAACCCGATGTGGGGGGAAAGGATGAAGTGCAGTACGGAAGCCTGGTCAAAGAAGTAAGCTCGGACAAACTTTTGTCCCATGCGGGCATTAGCGAGTGGAAAAGTGGTGTGAAGCGGAAGTCGATCGACGAAGGCTTCCGAGACGGTTAAGTGA
I	2689359	2689765	407	2689571	126	17.7903	2.38803	15.5425	ATGTTTCTTAGCCATTAATGTTTATTTATTTACTTGTTTCTGTGACATATAATATCATTACCCCCATTTGGTACCTCTTCCTCCCACTTTGATCAGCAATTACTCTCTGTAAGCTTCTCCAGGTTAATAAAGTCAAGAAGAGACTATAGCTATACCCCCATATAGTACTCTTTATCCCACATTTTGTATCACTCAAAATCAATTTCAACTAAGAGACCTAAGCAGAGTAATTTAACTGTCAGGTGGATTTGACTAAGAAAGTAGTAATAGCTTTCATTCAACATGAGTACTATCCATAGC
I	2766459	2768314	1856	2767796	190	28.9123	2.53396	26.1407	TTTCCATGGTTCTAGGTTCAAGGAATTTGCCAACAGTAAAGAATGCAGCAATGACTACTTTGATTGCTTTAATATATGCATGTTTGAGGCCCGGAATCTCTGATGCCATGCTCTCTTTACTGTGGGATTCAGTTATTGTCAACATACTTGAAAAGTGTGCCTTGAAAAACGAGGTTACTATTTTTGAGTCTTCTAACATACTTTTGGCTCTCTTTAACACGCTGTCTAATGGAGTTTGGAAAGATGACCGCTTGGTTTGCCGTGAATCGGTAGAAGCAAAAGAACTTCCAAAGCTCAATC
I	2876448	2877460	1013	2876769	316	99.6703	4.3615	95.2643	CTTATTTCCTTTTGGTTTTACTTAGCTTAGCCTAGCCTAGCCTAGCCTAGCTTGACCAGCCTTTCCATCGTACAGACTAAAACATCTTTGTCCCCCACTTCGTCCTTGGATTCTTTCGCCCACCGCACTAGAACAGAAAAGCGGCATCCCACATAAACCAAGACCAAATTATCCCACTTCATTGGGGCCATTAATGAATTTGTCAAGACAAACCGTTGAGACCTCTTAATGACCCCCATTCGTTCTTTTTTCTTTTTTTTTTTGCTTCCGACTGTTCTTTCCCATCCCATCCCTATCATT
I	2931573	2932605	1033	2932102	68	23.1171	4.24831	20.6776	TTTAATTCATCAACCAACAAATGACTTGAATGAATACGTTTGCCTCCGTTTTCAATATCGATAGGTCTCATCCCTTCTGTAAGGGGCGTGCACTATAGTGAACAATCCTGTTAAGTAGGATTATCGAACCCGACAGATAAAGTGTATATCGGTGATTAAAAAGCATTATGCCCAATGAGGCTGGAAACCGATTTGTGAACGGCGCAAGCTGGTATCGAGTATTTTCTCTTACATTATAGATAGGGAAGTGTATTAGATGCTGAATAACATCAGGAATTATCTAAGAGACATGCAAGATAA
I	2932737	2938895	6159	2935658	117	110.973	18.565	105.932	AATTAATAGCCGGTAACATTCCAGCCAGATGATGGCAAAGCAGAAGTTGTATTGGTACTAGATAGTACAGTGGAAAAACCGCTGCTAGAGAGACTAGTGAAACTGCTTGTCGACACACTGGAAGAAATAGTGCTAGAAATAGAAGGGATTGAGGTAGTGGAGGATACAGCGCTAGGGCTGGATGAAGTCAAAGTAGTAGACGACACAAGGCTGGAGCTGGATGTAGTCGATGTGGTGGAAGAAGCAGCACTAGAGCTAGATGAAGAAGGATCGATATCAACTGGAATACATTGAGAATAA
I	3157405	3158252	848	3158073	222	50.8502	3.31392	47.4727	TTAAATAAAATAGCAATGGCTAAACCAAATTTACAAAAAGTAAAAATACAAGGAGCAATAACAGAATCGTATACTGGAATGAAAAGGGCAGTTTGAGGCCCCCACATAGTACTTTGGAGGTATTAAAAAAGGAGATTTGTTAGTATATGGAGAGTGGCGCCCACATAGGTCTTTTGGGGACAAGTTGGAGAGATGCAAGTTGGAAGATATGTGAATGAGGAAAGAGGAAATTGGTGGGAATCAACGTGCAAAGCTGAAAGTTAATCGAACAAGAATTTTTGAATTACTAATAATTGTGAA
I	3394915	3395727	813	3395096	150	15.6255	2.07756	13.4599	GTTGACAAGAGTACAGACAGGGCGGCGATTGTCCTTGCAGTTTCGACTGCAGGTTGAGAGTTGGCGTCTTGCCATGAAAATTGACTAAAGGATGCTGCGTAGCCTAGCCAACAGATTCTAAAACGATTGGAGTGATCCTGATCCTTCTCCTTTGGAGAGGAATTGGTTGATCCTCTGACAACTGTATATTCCTAAATCTTTCGCTACATGATCTCTGGATCCTTGCAGTTGGGTAAAACCATACAGTTGACATTTTTCATTTGGGTAGTTCTTCTTTTATGATAGTTTAATCATGTGTAT
I	3753460	3754915	1456	3754763	176	22.8528	2.32166	20.4224	ATATGCCTATGAAATCTCTACCTGCTTTGCACCCTAAATATAACGTGTCGTCTTGTAGCTGCATGTGAATTACAACGATTGATAGATGAAAAACAAATCGACTTGTTGCCCATTTCATCGTTTCAAACGACTGGTAGTGTTGCTTGTGTCCATACCCATGCTGTGTCCATATCCATACTATGTCCGTGTGTTTTGCTTTATTACACTTGGTCAAAGAAATCTATATGATGTTCTTTACGAAACCCACAAAGTCACAATTGTGATCTTCCAATGCTTAATAAATACGAAATCTTATTTCGA
I	3755237	3756249	1013	3755796	138	15.3858	2.134	13.2293	CTTTACCGAAACTTTCAGATCTCGCCTATTTACCGATCCAATTGCTAGTGCAGTAATAGTTGCTTGAATTTTCACCGGATGAATCTTCTCTTGAATAAAACCGCCAATAAGAGCTAGTCAAGTTGACTACTGAAAATATACGATATTGAAGATGGCGTATGTAGTGCTTGTAATGGTCTGGTGGATGGTGGAAGCTTTCCACTCTTACTTAGCATTCAGTATTACACAAATGGATTAAGGAGAAGCGGTAAACGATTTTATGAGGTTCGTTTATTATAATGGGTTGAGTGACACGATTCA
I	3756600	3757296	697	3757145	140	13.936	2.0303	11.843	ATATATTTGAAATGTTATGCTAATCATACGTTCGGTAGGTATGAGTGAAATCTTCCTTCTATTTCCTTTTAAGTATTAGTTGAGTCTTCTTTTGATATTTCAGTTTCAGGTTCGCAATTTTAGGCCATTGGCAAGGCGAGCGATTTGAACATATGCATTCGATTCATCGATTCCGTAGAAAATTGACGATCAAATCGGTCAGTACGTTAGTTGCAGTGTAGTATGACAGCATGATAACATGACATTATTAAATGTTGCAATGGAAATGTACAATAACAAAGTAAGTACAAACATATATTT
I	3757428	3758115	688	3757971	164	30.1276	2.81759	27.3069	TGGTACTTGATTTATAAACACACATGTTTAAGTATATGTACATATACAAACCAACGAAATGTAATAATACATCCAAGTGATAAGAATGCAAAAACTTATTCAACAGCAGATACACCGTTTCTTCTGTTTATAACAGCATAACGTAACATATAGAATTGGAGACAATATAAGGTCTTGTTGAGTTGTTATACCTTTCGAGGTAATAATGGTTGATTGGAAGAGCTAGAGTTCTGCGGTAAACCCATATTCCTAAATCAAGCTTTAACCATCGAAAAAGTATGAGTCGCAGAAGTGATTTTT
I	3760101	3760333	233	3760239	107	10.8306	2.01605	8.89406	CATCAATATTTACACAAATGATATAAACACTGATTTTACCAAGATTACCAGCGATAAAATGAGTAAATTAAGCTCTTTAGAAGTCTGATGGTAATTGATAAATATCGTGTGGAAAGTATACCGAAGTTTGGAAGAACAAGAACTTTGAAGGATGAATTTTCCGAAATGTCTTTGGTATTTGTAATTTTACTACATATATTTTATTAACAGCATTTTGAAATTTTTCAAAAACTTATTTCCTTGTCTTTGTAGCTCAGTCACCATTACTTCACTAAGCTATTTGAGAATTATATGTTTATT
I	3761004	3761247	244	3761167	105	11.2569	2.06559	9.29762	CATAAAATGATTAAATCACATTCATTGCAATAGGAAACTGTATTCGGTATATACAATCGGTATTGCATGTTGTACCAAGTATAATATAGTGATGAGATTTTGAAGTTTGTGTTCTATTACCACATGGAACTACGTCAGGAGTGGAGACCATAATCGTTGTAAGTATGTTGACAAACTTTATCCAAAGGGTAAAAACTCAGTTCTTCGAGTTATAAATCGGACCAGAGTTGCCGCAATTGAAACGAATTAGATAAGTGAACAGGGCATGCTTAGCAAGTACAAACCAGTATAATTAGAATT
I	3765442	3766987	1546	3765766	106	17.3401	2.56648	15.1096	TAATTTATAAAACAAAATGTAATTTGCAATCAATGCTTAATAGTAAGTCGAATTGAGATGTAAACGTTAAATTATGAATAGCCTATAATTAGACAATTTATTAACCCCATTCAATTAGTGAAACTACTTTTAATAACACTGTCAAAAACCTTGCCTTCTGTTCAAGATATAGACTTCTCTATTTTTACATCATTATTCTACCCTAGTCAGAACATATACCTATCATATACTTTTTTCGCTCATATTCGTTGAATCTTTATATAAATAGTGTCTGAACAATAATCATAAAACTTTCTATGC
I	3767091	3767772	682	3767404	91	13.149	2.37032	11.0931	ATACTTAGCCTCAGCAGGAAAATTATTGATCTTTGATGTAAAAAACGAATATCGTGAAATTTGCTTGTTTAGTGTTTGAACGAAAAGTTGAATAGTTAGTTATAAAGCGTATAGAAAAAAAAAAGAGTAAGCACATGAAGAAACAATATTTTGTACACTTTGTGACTACACAAACTGTTTTTGTTCAACGATTTTTAAAACCTTTAAATAATAATTTCATCTTGTTTTACAATTTCCGCTTACAAAATGCCACAAATCAACAGCCTTCACATTTTCAGTAGCAGAAATTGTTAAATTCAA
I	3767983	3772458	4476	3769285	135	20.9934	2.52704	18.6246	AATTGTACTGCTGGTGACGCCCCGTATTTGTGTGTTAAAAAAACCTCATCGAGAAGGAAATTGTTTGATTTATGCGAATTCAACTCTGTTTATTAAATTTAGGTAAAAAACGTTTACTTTTCTCACCTTCTGGAGTTCTTTGGACCTACTATATTGCAAGTCAAAGTTGGTATTAGTTCATCGTCCTCCGTTTGGCAGGAAGGCCGTTTCTTTATGGTTAACATATCCGTAGTTTATAACTAAATAAGACCAGTTAAGCGGTATTATCACGTAACTTTTACTGTATTTATTGAATATAGC
I	3772674	3776905	4232	3776519	112	18.6265	2.60014	16.3443	TTTATGATTATTGTTCAGACACTATTTATATAAAGATTCAACGAATATGAGCGAAAAAAGTATATGATAGGTATATGTTCTGACTAGGGTAGAATAATGATGTAAAAATAGAGAAGTCTATATCTTGAACAGAAGGCAAGGTTTTTGACAGTGTTATTAAAAGTAGTTTCACTAATTGAATGGGGTTAATAAATTGTCTAATTATAGGCTATTCATAATTTAACGTTTACATCTCAATTCGACTTACTATTAAGCATTGATTGCAAATTACATTTTGTTTTATAAATTATCGCAGCCTTT
I	3777064	3777501	438	3777356	105	14.8879	2.36858	12.7513	GATGGTTATCACGCTTCCTTAGCATGGAAGAGGTCCCAGATTCGAGTTCTGGCTTGTCCAAATTTTTTATCAATTTTTTTGAAATCTCTAAATTCATGAGAATTAATGTGTTTGCCATCTTACAATTCAATAAATACATTCTTTATCCAAATACAATTATGCTTAGCAGTTGGTACAACGAATGACCTGATTATATGCTTAAATTCGTAATTTTTAAAACAGCTTCTAAATTACATTGAGTCTTAATCAATCAACAATTTTTGCCTAAATTATATATCGGTTACGTTTAAGAAAATAAAT
I	3777794	3779822	2029	3779698	149	17.9005	2.21844	15.6482	GGGATGGATGATAATTTGACGAGGCACATTCCTTATACGCAAACGAAAGATACAATTTCGCTTTGGCAAAACATTGCAAATGTTGCAATTGTCCCAATTATATATGCATCATTAAATTTGCTTAGCATTACTTTTTCCTTGGTAGTTACATGCAGTGCCAAACAACCGCTTTAACCTTTCATACAAAACTTTTGTGTATTCACAGAAGCATCTACTGGGCGGGAAACCATTTTTCTTGTTTCTGCATGCATTCTTAGAAGAGATTTAAGCTTTCCCTTGAATTTTCGAATGTTGATCAAA
I	3780413	3781262	850	3780665	174	20.185	2.19607	17.8416	TTTACTCCAAAGTCTTTATCCTCTTCGTTTATATCGCTAACAAGAAATCGTAGTCACAAATGTACATACGTTGAAACATTTGAACAACGTACAACAAGCCAATAATGACAAGAATGGAGATGAAAGTGGTGATGGTTAGTGGTAGTCGTGGTAGTAATGGAAGTGGTAAGTGGAAGTGGTGGTGGTAGTGGTAGTGGTAGTGGTGCTGTGCTGATGCTGGCGCCGATACTGGTGATGATGTTGATGCCTATACTGACACTAGTACTGACACTAGATGACACTAGTACTGGTACTAATGGT
I	3786963	3788883	1921	3788698	152	17.9654	2.2031	15.7106	ACTTCGTTTGCGCAACTCCTGCTTATCGTCTTCTTTCTATACCCATACTGTTGGATCAATGAATGAACGTAGCAATAGATACAAGATATAGCGCCACACTTTTGAGCATATCCTAATGACAGTAATTCGTTTTGTTCTAAGCGACCAAGTATTCGCTCTTGCAACACTATAGTTCTCACTTTGAGGAAACATTCCTTTGATGCCCATGTTCATTCCACTTGGATGACAGAATCCTCGATAGTATTAGTATTAATGAATTAACTGTCAGGATGTGTTGTCGTTCTTGAAGTAAGTCTTGTG
I	3789332	3789732	401	3789630	116	12.4672	2.07985	10.4445	ATCCTTTGCGTGAATCAGACACGTAGAATCATGTTTCTCTCATGACAAAGAGCACTTATAGTAGCATATCTAGAATTTCTCTCAGTTTTAACTTTCTTCGGTCTCGGTTTTTCCCTTGACAAAGCTGATAATATATCATGTACAATCAGGCAACACATTTATTTAGCCAACATTCTAGTTCAAAAGCAACTTTTTGCTAAATCAAGACTGTGATGGTGTAAAAATATTGCAGTCAATATTTTTGTACTAAAAAAATTGAAAGCTTTAGTTGATACGTCCACGGATTGAGTCCTCGCGAGC
I	3830366	3830579	214	3830441	122	13.8115	2.13576	11.7244	AGTAATCTCAGGGCTGAGAAAATACTCTGCCGGTAGACACTATACGGTACTTCTTAAACGTTTAAATAAAAGTAATTTATACAACAAATGTCTACGGCCATACCTAGGCGAAAACACCAGTTCCCGTCCGATCACTGCAGTTAAGCGTCTGAGGGCCTCGTTAGTACTATGGTTGGAGACAACATGGGAATCCGGGGTGCTGTAGGCTTCCTTTTATTCATTTTTTTTTTGTTTGTTTTTGTGTTAATTTATTGTTAAACATGAAATTTTTGTATTGAAATTTTGTCTTGAACTCGTTGA
I	3844874	3846564	1691	3845424	264	28.6164	2.1579	25.8672	ACGGTACTTGGAGCAGAGACGAGCAGTGTTACCGCTGGTGGACAAGACAACGATGGCCTTGGCATCACTCTCAATGGAGGCACCGATGGCAGCGACAGCAGTGGTCTCGGTAGCACACTCAAGAGGACGACGGACGAGGCCGAACATCTCTTGGTAAAGGCTGCCGTAAGGGATGGAAGCCTCAGCAACACGGGCAGTCTCAGCCATGTAGGTAACGGCTTCAACGGGGTAAGAACCCTTGGTAGTCTCACCGGAAAGCATGACCAAGTCAGCACCATCGAGAACGGCGTTACCAACATC
I	3875961	3876536	576	3876285	256	37.6637	2.51163	34.6632	AAGCCGAGCCTACTTATACAAAAAATTTGGGCTGGGAGAAAAAAAAGGAAAGAAGGCAAAACGAGACGTTCGGAACGAAGAGGAAACGGAGGTCGGCAGTGTTGTGATTCGATCGCTAAGAATGGAAGACCCGTCTAGAATCCTGTGATAGGGAGTCATAAAGAAGCATGATTGGTCAATAGACAAGTCACGACGACGATAGCCGATAACCAAGAGACGTCGTATGATGTCATTTGTTCGGGAGATGGAAAGGGCCAGGCACGTCGTACGAAATCAAGGATGGACCGGCAAGAGACGAAT
I	3991306	3992048	743	3991640	289	51.9427	2.83413	48.5373	TGAAAAACTGTAACATGCGCCAAGTTATCTTGGTCTTATACACCAAATCCACCAGTCGAATGATCGCAGCATAGCATTAAGCAGCATCCAACATGACGTGCGCGCACACCATATCCATCCAACAGACAAACCAAAGCGGCCAGTCTGGAACGAGAAGCGCATGAAGCTACAAATCAACATCCACCAATCGCTAACGACAATCTAGCTTTGAGGAAACAAACACTCAGGGATAGAAGGGAAATGCACAATCGAGATCCTAGTGTTATGGCCGTTGATTGGTCCATGTTCCGTCCCATTTGA
I	4095720	4096661	942	4096029	241	26.1706	2.15401	23.59	TTTGGAGGCTATTGACTCCATTGAGCCCCCTGCACGTCCCACTGACAAGCCTCTTCGTCTTCCCCTTCAAGATGTTTACAAGATCGGTGGTATTGGTACAGTTCCCGTCGGTCGTGTCGAGACTGGTGTTATCAAGCCCGGTATGATTGTCACCTTCGCTCCCGCTGGTGTCACTACCGAAGTCAAGTCTGTTGAGATGCACCACGAGTCTCTCGACGCTGGTCTTCCCGGTGACAACGTTGGTTTCAACGTCAAGAACGTTTCCGTCAAGGATATTCGCCGTGGTAACGTCTGTGGTGA
I	4139589	4139914	326	4139751	169	22.6633	2.35645	20.2401	TGAATGTTTTAAATTAAAAAGTTTTCTAGCGTTTGAATCCATGCCATCTCTTTCCCTCATCTCTCTCCGGCTTGACTTTTGCTCGCTTTTGTCTGCTTCCCAATCACTTGTTTCTAGAACCGGCCACTTCCATTATGTGCCTGCCGTTCTTATTGCTTTTGCCTCTATAAGAAAATACTATGGGTTTGTTTGGTTTGGTCTGGCTTCCATTTCCGCGCGATCGCTGTCAGACTAGATGCACTAAAATCCCTTGCACATTAATTAAGAAGAACTTTGTGGGGATAGGGAGAAAGCGCATCG
I	4141041	4142250	1210	4141876	217	22.8964	2.11932	20.4649	CAAGTTTCAAAAGTTTAAGAGCTGGGGGCATCACGGCAGGCAAGGGCAGTCTCTTCACCCATAGCGGAGACAACGGTAATGATCAAGTCTCTGCCCTCATCAAAGCCCTCCTCAATTTCGTTACCGAGCTCACCTTCGGGAAGACGAACATCATCCTTGGTGGTACCATCGGTGGTCATGAGGTTCAAGTAACCATCATCAATGTTGACCAATTGGTACTCATCACGCTTAACAACAGGAACGTCCATGTTGTGAGTGGAAGGAGACATATCCTCGTACTTGCGGCCATTGAAGATGTCA
I	4360524	4360826	303	4360647	138	16.9233	2.23265	14.7084	TAAAAGTATCGCTTTTTTTTTTTTAACCAGAAAATTGTTCTAAGCAGCGCCTTTTGCTAGTGCAACAAGGTGCAGTGGGATACAGGGACATGACTCCCACCTTTCTCAGCTGTACTTTAAATTGCTACTCTCTGGTTAAATGTCCCCCACTTAGTACTTTTTCTGTTTAAATGTTGTAGTAAAGACAGAAAAGTAAAAAGCCTATGTTGCCCCCACATAATCTAGTTGTCTATCCAAAAAGAAAGCCAAGTCAGGCCTTGTTATATTGTATAGCTTAGCTTATCTGTTAAATGTTTTTGC
I	4415374	4416943	1570	4415752	181	22.3887	2.26857	19.9748	CTTCTTTAACGTTCCCTGTTCTCCCCAATGCCAATAACGAGGCTACAAATGAGACGGCAGATTCCGGGGATGCAGAAGTTTCAAAAAATGAAGGTGTATCTGGCATTGTTCCAACCCTTCAAAATATTGTTGCTACTGTAAACTTAGAGTAAGTCGTGCCTCTTTGGATAGGGAACAAGGCGTATTGCCGTCGCGGTGAGTTCATCGGAAATCTTTTGTATAGACATGGCGTTTGGGTAAGAGCGATTGTTAATGGTTATTTGATTTTTGTTTTGTTTATATTTAACTACCATGTCACGA
I	4455879	4457637	1759	4457018	303	76.9181	3.61907	72.9999	GACACTAAAATTCGCCACCTACGCTGACATCTTAGACATTAGCTACGCCAGTTTCCGCCCAGTACTTTGAAAGTCGCAAAGTGGGGGATTTCGATCCTTATGGGGGTAGGGTGAGCGTTAAGACTAGGAAAGGGTGGGATGGAGGGGACTGGTGAAGACTTGGACTGGGGTTCACGTGTGTGGGAGATTTTGGTCTATGTGGGGGATTGACTGGATTGGTAGTTGTAAAACAAAAACACAACGGTTGTAATGTAGTAGTAGTAGTAGCAGTATAATGTGTTTCAAAGTTGGTCTTGATTG
I	4705500	4706277	778	4705988	167	30.9825	2.83748	28.1351	TTTCCAACTTTGGGAGATTATCACATAAGCAGCGAACAACATCTTGGGTTGATTTTGGTCGTTTATTGAACAGAAACGACATGCGGAATTATGGAATTCGGTTTCTCTAAAAACTTATGGCATATGACAGGGTAAGTAAAGTGGGTGCCAGGCGATGGTCCACAGTGGGGGTCTATTTTCATATTCAGTTGAATACTATTAAGGTACACTTCTTGAGTATTCAAATTACCTTTACTTATACCTGAAGTGATACCAATGTGGGGGTTGTTACATCTCGATTATACATAAGTAATCAAGTAT
I	4715341	4715550	210	4715450	125	13.7947	2.11349	11.7083	AAAAAATTGTATTGTGTGCTAATCAATCAGTTTTGAAATACAAACCAAATTAAAGTATAGGAAGCAGTCAAATAATCAATTCGAGGATACATTCTCATTGTTAAATGCAAACTTTAGGTAATTCGTAATTAGCTCTTGTAGCTCAGTGGTAGAGCGCTTGCCTAGTAAGCAAGAGGCCCAGTGTTCAAGTCACTGCTGGAGCAAATTTTTTCCCTTACCATAAGCGTAAATTATGCTACACTTCACTATGCATCACTACATATATTTGTTCACTGTGTAGACAGGATTTTTATTCTAATT
I	4787397	4788730	1334	4787899	344	126.115	5.06205	119.013	TAATTTGGCCAGTATTTACCGAAACGCTGATTAGTAAATGTTCAAAACGAACACCGTCCGTATTTGCAGAATGGAATATGGCTTGGAGTGACCCCCATTCAGTACTGCTGGGGTATCTCCAAAAGGAATCAAGTCGTAAGTCACTTCCCCCACGTAGGCCTGCTGGGGTTTTCAAAAAGAAAATCAAGTCTTAGTCTAGGAAACGTGCTCTCAAGACGAAGATTGACAAAAAAGCCCTATGTGGGGGATGGGATTTACACAAGTAAGGCATTCGAAATTTCGGAGTCGTAGCAACTGCAG
I	4918202	4918895	694	4918692	199	20.9323	2.11018	18.5652	ACGCTCGAGCTCACGGTTGATGGATTGAGTGCTCTCAGCATACTTCTTGGCATACTTGGTGAAAGCCTTCTTCTTGCTCTTGAACCAGTTCTTGTAGAAGCGACGCTTGACTTCTTCAGACAAGTGCTCGGCCCAAACAGTAGTAAGGGAGCGGAGACCACGAGGAGTCTCGACATAACCAACAACACCAACGACCACCATAGGAGGAGTCTCGATAATCGTAACAGCCTCAAGAATCTCACGCTTGTGCATCTTAGAGCCGGGACGATCAAGATCGCGAACAATATGTGTCATACCAGC
I	5173708	5174516	809	5174098	208	24.2956	2.21775	21.8059	GGCGACTAAAATCTAGTAGGAAATCTAGTTGTCAATGAGCTCCTTGGAGACGTACTTGCCGTCCTTGTCCAAGTGGTAGACAATGGGGACACCAGTGGCAAGCTCACGCTTGACAATTTGGTCACCAGTAAGACCCTCCAAGTCCATGATCAAGGCACGGAGAGAGTTACCGTGAGCGGCAATGAGAACCTTCTCACCCTTAAGGATGTGAGGGACAATGGTGGACTTGTAGTAGGGCAAGACACGCTCGGCGGTGTCCTTCAAGGACTCACCGTTGGGAGGAGCAATGTCATAAGAACG
I	5298423	5298792	370	5298585	159	23.5263	2.47689	21.0705	GTCCTTGGAGAGAACATAAGTGCGTTTAAATCATTTTATTCACTATCATCAATACAGTTGTTTACAACCTATAAAAGTATCCCACATATAGCTTGTTCTTCATACTACCGGCTTCGTAAAGGTTCGAGTTACCCCCACATAGACATTCGCAAATACTCTGGGCCTAGTCCTACGAAGTGAATGTGAACGTGAACTAGATTACGACTACAACTAGAAACTAGCGCTATGTGGGGGCCGTACAATGATGATTTATTAAACAATTATACTTCTCTTTTTTACTGACTTCTGTCATGGTTTTAG
I	5314885	5315526	642	5315074	158	17.4882	2.14002	15.2518	CTAAGGTTAGCAACAAATACATTATTGACGCTACTGCCGCTGTCAACGACAAAATTTTCGATGTCGCTGCCTTTGAGAAGTACTTGATTGACCGTATCAAGGTTGATGGCAAGACTGGTAACTTGGGCTCTTCTGTCGTCGTTTCCCGTGAAGGTTCCAGCAAGATTGCTGTTATTGCTCACATTGATTTCTCTGGCCGTTACTTGAAGTATTTGACTAAGAAATTCTTGAAGAAGCACTCTGTAAGTTATTTTTGTAGTTTAATCGGTTTTTTCTGACTTCTAACCAAAATCCGTAGCT
I	5571195	5571486	292	5571356	126	14.914	2.18477	12.7763	CTATTTGTTTCATTATTGTTTCATTATCTGTTACTACTTTATTCTCTACTTTATTTTTTTACTTTCAATAACAATAACAAAAGTTGTACTTTTCTATATCGTATTCAATTCCTATTTGACATATTCATTGCCAGCTGACACATCACCAGTAATTGTAACGACTGTTTTTTCAATAATTTAGTTGATTTGTTTTAGTGGAATAGAATGCACTAATTTCATCATCTACTTTCCAATATTTTCATCTTCTATCTCTTTCTCTATCTCTTTCTCTATCTCTTTCTCTTTCTCTTCCTCTTCCTC
I	5576033	5576409	377	5576259	99	10.4309	2.04218	8.51696	CCTCAACGATTGAAGTTGCTATGATGGATGATGAGTCAAAAGAACTTGTAATTAGCACGCTTCCAGAAGTCAAAGTTGTATTCATGCTTGTTACAACTGTTTGCGAACTTATGCTTGTATAAACAAACGTCGTATTATATGCGTTTTAAACTTTGGTAATGAAAGATTTTGAGGAATTATTTATGGTAATAGGTGTTTATCCCATTCTTCAAATCTAAATGATGACGAACTAATGCAAGGGGAAATGTTACATAGACGATGTGTGTACATACATGTTGTGCGCATTCATCATCGAGGGAC
I	5578469	5579115	647	5578934	149	17.7826	2.21138	15.535	CCATTACGTGTGAGAGGAGGAAGTGGAGAACCAGTTGCCATCAAAGCTTTACCATTAGACCATTCGTCAATTTGAACGGGCTTTGCTTCCATGAGAGTGGTGGGGTTAGAGATTGGGAAGATGATGGGATGTTTGACATGCTTGCTCATTTCACGAATGGCCTTTTCTGTAAATTTTCCAGGTTGACCGGAGCACCCCAGAAGAACAGTGGGTTTGATTAGTGAAATAGCAGTCTCTAAATCAATGTCTCCAGAAGGGACTTCCTTAAAGTCTGAGTCCTTCTTCAAAAATGGCTTTTGT
II	154626	155182	557	154863	150	14.607	2.01771	12.4832	GGGTCAGGAACTTGCTCTTGCCAATATCCCACGAGATTGGCCGATTGATGAATACCTTGATGTTGAAACGCAGAACTTCTGGAAACTTTTTATGAGTGGCAATCCTAGTCAGGAAGAAATTGAGAAGACTATGGACATTGTTAACAAACGTGCTCGTGACAACGGTCGCACACCAATGCATTGGGATAGCTCACCCAACGGTGGTTTCACAAAGGCTGGAGTAAAACCGTGGATGAGAGTGACTAATGACTACAAAGAATGGAATGCTGCCAATCAAGTTAATGACCCTGAAAGTCCTTA
II	227964	228401	438	228147	205	25.6245	2.29072	23.071	CGTTTTCAAAGCTAGCTTGTTTCCATCTTTCCAATTCATTATTTAATTGTTTTGCGCAATTCGCTGCATGTCAGTATGGATCTGAAAAAAATGTGGGTAAGAAAGGAGGAAGGAGGAAGGAGGAAGGGGGAGAAGGAAGCCTTGAGTGGGACGGGTAAAGTTCGTTGTGGGGGGTTGTTAGTGTGGAAGGATGAGTAAGCGTATAACCTTTGAAACAGATGAAATACCTAAGAGAAAAATAGCGTGAAGTAAAGGGCTATGTGTTGTCAAAACATAGCGAAACGTAGTGAATAATGTTAA
II	352451	354015	1565	353156	176	30.348	2.71739	27.5215	ACTCACAATTCGTTCAATTGTATGCAAACCAAGGCCCAGGCTGTACAATCATCCTGACCAGATAAACTGTCACATTTCATCGTCATTCGTGTGAAAGATAAAACATGACAGTCACGGAGTCGATATTTTGTGTAGTTGAGGGTGACAAACAACGGACGGCAAAGGAAAAGAAAAAAAAATAAAAATAAAAACGTTTTATTCTTGGAAGCAGTTTAAATTGAGTGAGTGCAAAAAATTCATTAGTGCAAAACGTACCATAGATGCAAAAACGATCTAGTAAAGTGCAAAACAATATAGTGA
II	517457	518184	728	517770	151	21.0486	2.39298	18.6773	TGGTGGCAATAGGGAAAAATTAGAATGGTTTGAACTCAAAGACTCATTGCTAACTATTTTTTTAGGATGTCAAGTGCCCTGGATGCTTCAACATCACCACAGTTTTCTCTCATGCTCAAACCGTTGTTATTTGCGGTTCTTGTGCCTCTGTCCTTTGCCAACCTACTGGTGGTAAGGCTCGTCTTATGGAGGGATGCTCTTTCAGAAGAAAGAACTAAAAGGTCTTGTTCATATCTTGCATGTCTTGATTATTGAATAAAATTTTGTTCTAGGCATGTGGATGATATAAAATTAGATGTT
II	625770	627584	1815	626968	220	34.4282	2.5878	31.4896	TTACCCTTGACGACACCAGCCTTGGTCTCCTTTTGCCAGCCTTGGTACCAGGGCATGTTGGTGGTGGGCTCAATCATGTTATCACCTTGGAAACCGGAGACAGGGACGAAAGGAACGGTCTTGGGGTTGAAACCGACCTTCTTGATGAAGTTAGAGGTCTCCTTAACGATTTCCTCGAAACGAGCTTGGGACCAGCCAGTGGTGTCCATCTTGTTGACGGCAACAATAAGTTGCTTGACACCCAAGGTGTAAGCAAGCAAAGCGTGCTCACGGGTTTGACCATCCTTGGAGATACCAGCC
II	890963	891584	622	891328	182	35.3027	2.93076	32.3482	CCGTTTTCACCCCATTCCATCTTATTATCTAAACTTTGCGTAGCGTTATATCCTCTGTCGTAACCAACTTTTATTTTTACATTTCATATGTTGCAACTAAGGCAAATTAAATCAATATACGCTCTTCTCACCGTCTTCCTCAACCACCCCCACTGAGATCTAAAGTGGGGTGCATTTCCATACTCATTTAGAATCATTCTCATAGAATCACGCTCATATGTCTAAATATACTTTTACCTGAAATCAGCACCATACCGATTGCCCCCCACTAAGTACAAATTGATCCCACTTCTACAGGAT
II	1079862	1080495	634	1080141	299	114.306	5.26536	109.062	TCTCATTTACTTTTAGCCTTTTGTTTACTCCTTTACCTCCACATGGTTAGATTTCAGGTCAGTCCCCCACTTGGAGCTTTTTCAATACCATGTGGGAAAATCGATTATGGACTTTTAATCCCACCTGTGTATGCCCCCACATGGAACTTTCTATAACTTTCCATGGAAACCGGGGATGGAGCAATATGTTCAAAGAATAATGCTAGAAAGATTGTATGCTGAATCCCACAAGGTACGTGACCCCCACAAAATAATAAGCATACTTCCTATGGTAATAAAATAATAATATAGAGATTTTGC
II	1268183	1268606	424	1268320	257	23.5088	2.00415	21.0537	TTCCACCTCCATATCTTCTCGGTTCCTGGCCTCCCCTCACCAATCGTTGCTCTTCTCACCTGCCGCTCGCATTCATCCATCTGCCCTTCACGTCCTCTCATTCGTTCGTTTCGCCTATCCTCACCGTTGCCCTCGCTCCGTTGCCTTAACATTTCCCGCATGCCGTTTCGTCCCCCCCTCGTCTGACGTCAATCACGCGATCGGCCGTACCTCTGGACGGTTCGTTTTTCCCAATTCACTTCCCGAACCCTCCGTCCACGGAAGTGACGCCACTGAACTATAAAAGGGCGACTCCCTCCC
II	1307680	1309353	1674	1308202	174	25.653	2.48137	23.0991	GGTATCTTTTTGACTATAGTTTGAGATTAACTGGGTGTTAAAGCTTAGTAGGGGGTAAATCCCGTACGCATACTGAAACCTTGAACTCAAACTGAATCTTTGTCGTTCTTTAAGTGCCTTGTTAAACTTGTTTGTAAAGGTATGTTCGCCGTATGCTGATTGATGTCTGAGTACAACGAAGCTGTTCTGATGATATTATTATGTCTTCTTTACCCGTCCTATCGACTATGACGATAACTTTGTCTCCACTATAGGTGGAGACCATACTTGCCAGTATCTTCGATGTCTGAATTGTTTTCG
II	1455098	1455395	298	1455264	145	18.1436	2.26016	15.8812	TATATTTTTCTTTCTCTCATCTCACTCCTTATCGTTTGCTATCCACTGCTACGCACCGCTTTCCACTTCTTTGCATTGCGGTTGGCCACATAAAGTTGACATGCAATATTTTTTTCCTTGGTCTCGAATTCTCAGGCCGACATGGGTCGGCCGAGCTCTCCTCTCAAAAGGAGGGGTAATTGAAATGCTGGGCGGGGAAGCGGGGATGCTCGGCAAATGATATGCGGTTGTTGTTTAGTGGTAAAAAGGGGGGGGGAAAGGGAATTTTTTGGGTGGGGCGAAAACTAACAAGAATCGCAA
II	1476048	1477335	1288	1476412	197	25.1701	2.31264	22.6409	CAGAGTATTTACGCTCAGGAGGAGCAACAATCTTGACCTTCATGGAGCTAGGAGCAAGGGCTTGAATCTCCTTTTGCATACGATCGGCAATACCGGGATACATAGTGGTACCACCAGACATAACAACGTTACCGTACAAATCTTTACGAATATCAACATCACATTTCATGATAGAGTTGTAAGTAGCCTCATGAATACCGGCGTTTTCAAGACCCAAAGCTGAGGGTTGGAAAAGAGCTTCAGGGGCACGGAAACGCTCGTTTCCGATAGTGATAACTTGACCATCAGGAAGCTCATAAG
II	1597965	1598910	946	1598119	168	23.9585	2.43349	21.4844	AACTTTGTAAATAATATAAAAAGAAAACGGTCAGGGAGGGACTCGAACCCTCGACCTCACGATTAACAGTCGTGCGCAATAACCAACTATGCTACCCGACCTATAATGCTCCTGGTGAGGCTCGAACTCACGACCTTCCCCTATCATCATATGAGAGGGATGCTACCACCGACTGAGCTACAGAAGCATGCTTTAAACAAATGAAACTAATAGACATTATATTTGTATTTACTGATAATGCAGTATTCAATAAAATTGTTATTCTCTGCTATCGCGGTGGCTTGAAAAGGTTTGCTTCTG
II	1599582	1600564	983	1600382	147	18.7848	2.28541	16.4963	GTGGACAAGCCAGAACTCGAATCTGGGACCTCTTCCATGCTAAGGAAGCGTGATAACCATCTACACCACATGCCCATGGTTGATTTTTACTCTATGTTAGTCGATTATTACTTTCTTTGCTATTTGCTATTATTCTTTTCCAACGCACTTTGATACTACCCACGCTTATCATAGTATACAAATATAACATACATACAAATACAACATACATACATATATGTATATATATATATATTTACTACCACTGCAAATAATTGTTACACCTTTACTACTGTTGAGTTTTCCTCCGTTTTTTTATTT
II	1600913	1602634	1722	1602218	239	31.6568	2.37046	28.7867	ATTAGAAACACTTTGATTTCATTTTAAAAATACAATTATTTTAGTAGTGAATTTATTATATGAGAGATGGGACATATAAACTATTTTACTTATATACTATTGTTTACCCCGTAACAGTAAGGTCTCGTGGCCCAATGGTTAAGGCGCTTGACTACGGATCAAGAGATTCCAGGTTCGACTCCTGGCGGGATCGATCTTTTTGCACTAAATCAAAATTTTTGGTATTTTGGTTAAGTAAAGTCACAAAACAAAAACATGTGGAAAAATCGTAAAAGAATCCTCTCCCTCCGGGATTCGAAC
II	1602975	1603776	802	1603146	265	26.5378	2.08374	23.9346	TGTGATTGCTTCAAATGTTTGCAATCTCACTCGCCATACTCACTTGGGTTTATCATGCATACATTACCGATCTACCTTTGATGGTGCTATCTTCTCGCTCACTCACGGACAATCAGAGCTGAATTAGCTTAGAATAACAATGTTGCCGAATAAATCGATTACAGTTACCGTATGAACATTACATCAAGTGCGGCAACAAAGGAGACGGAAAGTTTAAACTTAGTGAATTGATGTCGATGATGTCAGTCAATATAGTTACACATTTCAGCGTATTAACAAGAATTTATCAGTCCGCTTGCA
II	1604140	1606256	2117	1604943	217	23.1666	2.13048	20.7244	TGCTTTTAGTGCGGTCATTTAAAGGCATAGCGATGATAGTTCTAAAGTTACTGTATTGATCAATTGGAAGAACATCCAAATAAAAAAAAGTATGCAAAATGCTAGTATTATCAGTAACTGCAAATAAAAAAAAGATAACAAAAATTTACAGGATCATCGAGAAGAGTAGATACTGATAATATTGAGATCCACAGCACTCAACAACAGTCTTGGATTTATTTAGCCATTTGCTTAACTTACTGTTTCAACAATATTGTTGTTTGGCATCGCCATAAATATATGACCTAGAAGTAAAATTCG
II	1608964	1609382	419	1609287	152	16.3398	2.1082	14.1472	CTAGCAAAATGAAGTAACATTGTTTAAAAAGAATTGGTCGAAAGCATCAAGACTATCAAGCTTAAATACATTCAGTAACGAAATTAGTCATATAAAGTCTTTCGTAATACACAAATTTTTTAGCGCACACGTTATTCCTGCTTAAAGCTCGTTTCTCTTCATCCATTTTACACAGATAGTGTGATCACGAAGAATTACTAATAAAACATTGAGGCGTTATGAGATCTATGTCGCTTCGCAAAACCGTATCTTAGTACGACATAAAGTTGCTTTTGGACTTGAACGTTGACTAAATAAATG
II	1609506	1612879	3374	1611871	152	14.7415	2.01541	12.6118	TTCAAGTTAAAAGTGGCAGAAAGTGTTTCCCGATATGAGATAACCCAACGCATATGTTGTTGCAAAAACTAAACGCCCATTCATCAAGCGAGTCGAGATGAGAGGAATCATTGTATAAAAGGCTAGCATGTAAAAGCTGGAAGAAGGAAAGAACACGGGATATGTAATGGAACATGGGAAATTGATATGGACATTGATATGGACCTTGATATGGACATTGATATGAACATGAATATGGTATAGAGAACTACATCGACACAGAAAAGAAAACAAAAGTTGCTAAAATGACAAAGGTGCCGA
II	1619127	1620184	1058	1619333	114	15.4321	2.32294	13.274	CAAGACTCGAACTTGGGACCGTCTGCGAACTGTAAATGTTAAGCAGAAATTATAACCATCTAAACCACACGACCAGATGTTGGTTTTATTATTAGCTTTATTTGTAATATAGGTTTATAAATGAACCTTAACGTCAAATTGTCTGAAGTTACGAATACACAAATTATCTTTATCTGCATGTTTCAACTATCTTAGCTACATTATCTCATGCATAGAACTTTTTTGAAATTTATCAATATGGCTTTACTATCAGAAATTCTTCAATAACAATCTTCATTCTTAACTTACGTATATCGTAAC
II	1620597	1622154	1558	1621518	112	19.3371	2.65884	17.0271	TTCTTGGTTTTAAAATTCGACGAGTTTTTAGCATCAAAGCAAAAACCTGAAGATTTGTATCTTATTCATTTTTCTTTAAGCGGTTTAGCTGGTTAAAGAAAAATGTTTTCCAATAATATTTATTCACATGTACTGCTTTGTGATGCGTAAGCCGTTACTCGTTAATATGAAGAAGCATTGGTTAGTCCTGGTTGATTTCTATGTTTCCTTTTTGGCTTCGGCCAATTCTACTTTTTTAAGTATTCCGTGTGTTATCTTTATGGACTATTATTTTAAAATCTGCATATTAGGTTTAAGTAT
II	1622247	1627549	5303	1627398	140	28.6716	3.0024	25.9089	GAAAAGGCAGTCAGGCAACCAGTTAACAACCTTTTAGAAGTAATGCATACTTAAGTTATGAAAAAAAAAATTCAAGTCCACTTCCAATCCCATAAAAATGAAATAAAGCAAACAGCAGTAACCTTGTAAAGCACTAAACTCATTACTAGAAACAGTGAGGTGCAGGGAATAAATGTACATAATACAAATTAAGCCGCATATAAGGACGCAGCGAGCAAAATAGCCTTCCTAATCAAAATAACTAAAAATAAAGATAAAAGAAGAAAATTCGAATAGTGTAAAATTACACACAGAAATACT
II	1628191	1629525	1335	1629334	145	15.8342	2.11874	13.6607	TTTCTGCTTAACATTTACAGTTCGCAGACGGTCCCAAGTTCGAGTCTTGGCACGATCAATCGTTTTTAAGTTTTTAATTTTTTACTTTTAAAAAAGAAATTATATCTGCTTCATTAATTAACGATTCTTTTGGAATGAAATCATTTTTACTTTTTTAAATAAAATGAGATCAGCAATTTTGGTTGGATTAAATTTTTTTTTTTATTTACTTGTTCCATTGTAGTTCTCATTTTTTTCAAAAGTGTAATTACTAATTATCTGTTGTTTGTAATTAATTATTTTCGCATCGGATTTAAATAA
II	1629798	1630755	958	1629966	246	25.8345	2.12314	23.2716	GGGTAGTATCAAAGTGCGTTGGAAAAGAATAATAGCAAATAGCAAAGAAAGTAATAATCGACTAACATAGAGTAAAAATCAACCATGGGCATGTGGTGTAGATGGTTATCACGCTTCCTTAGCATGGAAGAGGTCCCAGATTCGAGTTCTGGCTTGTCCACTTTTTGTTTATTTTTTTTTTGAAATTTACTGATGTATAGTGTACTGTGAGATTCATTAAAAAATAAAAAACATGGTCACAGCCGGGTTCGAACCGGCGACATTCGACTTATTAGATCGACATGATAACCGACTACATCA
II	1630846	1633294	2449	1631495	158	16.4121	2.07968	14.2169	GAACAGGCATTCATCAAAGATTTGTCTTCATGATTTACTAAAATACTGAGTGTTAAGTGTGAGAGAGAAAAAGAAGGAATTGAACCTCCGCATTCATTTGTGCATTCTGTTTGCCATTATGTATAAAGTATCAAAAGAAAGATGACAAGGTAGAGGTCGTACAAGTTGAAAAAATCAGATCATAGGCTCTTCAAGTCAATTTTGTATTTTGTATTTTGAAAGAATGGGCAAGTAATTTTTAAAAGGTTTGGTGATTTATTACAGTTTTTTTTAATCTATAAAATCAGTGTAGCCATCAAA
II	1638115	1638549	435	1638472	134	15.0756	2.13987	12.9317	TGTTTCTCTCATGACAAAGAGCACTTATAGTAGCATATCTAGAATTTCTCTCAGTTTTAACTTTCTTCGGTCTCGGTTTTTCCCTTGACAAAGCTGATAATATATCATGTACAATCAGGCAACACATTTATTTAGTCAACGTTCAAGTCCAAAAGCAACTTTATGTCGTACTAAGATACAGTTTTGCGAAGCGACATAGATCTCATAACGCCTCAATGTTTTATTAGTAATTCTTCGTGATCACACTACCTGTGTAAAATGGATGAAGAGAAACGAGCTTTAAGCAGGAATAACGTGTGC
II	1639680	1640353	674	1640252	125	14.2645	2.14648	12.1565	TTTAAACTCTGATTTGTAAATTTATTTTTATTTTTATTCTTATTTATTTTGTCACATCTTTACTTGAGTGTTCATGCGACATTTGGAAAAACGGTGCAATTGAGCAAGGCTGAATTACTTATTTTTACATTTATTGACCACTTTCATTGAAGCTAAGCTATATAATGAATGCAACGGTTATGTGAGATTGAGTAAGAAGTGTTATGGAATAAGCAAAGTTAAATCAGTAGCTTTAATTTTTTGTTGTTTTTAATTTTAATTTGCAAACAAACAAACAAAAACGTATTCATATCATACACC
II	1644493	1645923	1431	1645682	167	36.0293	3.13861	33.06	TATACATCAGTAAATTTCAAAAAAAAAATAAACAAAAAGTGGACAAGCCAGAACTCGAATCTGGGACCTCTTCCATGCTAAGGAAGCGTGATAACCATCTACACCACATGCCCATGGTTGATTTTTACTCTATGTTAGTCGATTATTACTTTCTTTGCTATTTGCTATTATTCTTTTCCAACGCACTTTGATACTACCCACGCTTATCATAGTATACAAATATAACATACATACAAATACAACATACATACATATATGTATATATATATATATTTACTACCACTGCAAATAATTGTTACA
II	1646226	1647031	806	1646454	195	28.4141	2.47634	25.676	TTGATCGTGCCAAGACTCGAACTTGGGACCGTCTGCGAACTGTAAATGTTAAGCAGAAATTATAACCATCTAAACCACACGACCAGACGTTGATGTAATTAGTAATAAAAATTATGTATACTCAAAAAAGAGCAAAACTTTTAATAGACTGCACTGCATGAGCTGATTTGTGAAAATTATTGAATTCAGATGAACCTACCGCTTTTAAAAGGATGAACACTAACGTAGGTTAATCAACATATTAAACTGCCATTATAAACAATCGTTAGTAAAGACTTAACAAACACTTTCCAAACAGTC
II	1647139	1647433	295	1647303	106	10.6481	2.0083	8.72154	TTGAATATGGTTGAGATTTCAGACACTATACTATTTTCAAAAAAATCTGATAAAACTAATGTTTGATTTTTAACTTAATAAATAGCATTTCGACGGTTGGACAAAAACAAAACTCAGAAGAAATCAAAAACGATCCCGCCAGGAGTCGAACCTGGAATCTCTTGATCCGTAGTCAAGCGCCTTAACCATTGGGCCACGAGACCAGTATTAATTGAGTTGTTAAACAAAATAAATAAGTATTGATTAAAACACTTTTGCAATGTCACAAAGTAGAATCACTGTATCGATTTGCATGATATT
II	1742398	1743133	736	1742698	159	23.0801	2.45112	20.6418	CGTACATATACGAGTTCCACAAGGAGTCTAAATATCGACGAGAAATTGTAATCAGATATTAAAATCTAAAACTTTCGTATAAACCATGTGTAGCAAGTGAATAATAATCTTTCTCTTTATCTGCAATACAAATGTCGTTAACCACCGTTCAGATACTACTGGTTTAAGGTACGAACGTAAAGTACTGTTTTAACAATTTCAATGTTTCAATCGGTTTCAGAGGACGGCAAGAATCGCGCACTAAAATTAGCAACCCGCAAATGCGCATTCTGAAAGCGATTTTTGGTTTGTAACACAATC
II	2045589	2046540	952	2046227	197	19.7538	2.06558	17.4264	ATGGGTGTTCCTTATGCCATTGTCAAGAACAAGGCCCGCCTTGGTACTGTCATTCACCAAAAGACTGCTGCTGTTTTAGCTGTCACTGAGGTCCGTGAGGAAGACAAGAACGAACTCGCTTCTATTGTCTCCGCCGTTGATGCTAACTTCTCTGCTAAGTACGACGAAAGCCGTCGTAAGTGGGGTGGTGGTATCATGGGTGGTAAGACCCAAGCTTTGCTCGCTAAGCGTGCTAAGGCTGCTGCCGCTACTGTTCGTCTCTAGATAAATTCATCTGGATTGAAAATGGAAATTCTTAAG
II	2113157	2113702	546	2113437	291	74.51	3.63968	70.6282	GCGTTGTATAACGTTTCTGCCATACCCTTTTTAAGTGGGATGAAGTATAGTGAGGGAGGGTTGAAAAGGAAGGAAGAGTTGACTGTGGTATTCGAGGTAAGTGTCATACCCTTTCCAAGTGGGAGGTAGAGATACGTGGGGGTAAAGACTGAGGTGAGTAGGAAGGCGGTAAGGGGAAGAAGGGTATAAGGAGAAAGAGTTGATTGTGTTATTTAAGGAAAAGTGTCATACCCTTTCTAAGTGGGGGATAGCAAAATAAGGAGACAGAAAGTTGGTTGCGTTATTCGAGTAAAATGCCAT
II	2200986	2202595	1610	2201683	256	30.4275	2.25081	27.5983	TACTGAGAACAAGTCCAAGTTGGGTGCTAACGCCATCTTGGGTGTCTCCATGGCTATCTGCCGTGCCGGTGCTGCCCAAAAGAAGCTCCCTCTCTGGAAGTACATTGCCGAGAACTTTGGCACCAAGGGTCCCTATGTCCTCCCCGTTCCCTCTTTCAACGTCTTGAACGGTGGTTCCCACGCTGGTGGTGACTTGGCTTTCCAAGAATTCATGATCCTCCCCACCGGTGCTCCCTCTTTCTCCGAGGCTATGCGTTGGGGTGCTGAGACCTACCACACTCTCAAGTCCATTGCCAAGAA
II	2584892	2585532	641	2585249	203	42.8488	3.11592	39.6982	AGCCCCGCTAGAATTGTTGTCATAGAATGATACAACCTCAGTCTAAGTTTGAAAGTTTAAAACTTTCTTACTACTCCCCCACATAGGAGGAATTCTCCCACTTGAAAATCTGGGGACTAAGTCTTATGACTTATAAGTAGATGGGTATCCCACTCAGGACCGCGGCTCCCACTTTGTCAATAGCTAGGTGAGGGTGATAGAAATAACATCTAGGTAAATAGTAGTTATAATGGTATTAGCTTAAGACACACACTCTCTGATACACAGTGTTTCATAGCCAGCATCCGTGATCCCAAACAT
II	2585692	2586366	675	2585863	162	23.6252	2.45932	21.1651	ACGATTTTCTATCCTCTCACTAGTATACATGTACTATGCATCCTAATGACCGTTCATCCCATCCATCTATTTAGCACAACACATTATCTTACTATACTCTATGATTCCTTCCTTGTCTATATCTTAGTTCATCTTTGTTTATCTAGTTACCCCACTTAGGTCATTTTATCCCATTTACTTCTTTTGTCTCATGGCAACCTGATGGAACATAGCAGAACGTTGTGGGACCTTTTAACCTGGTTTACAAAACTCAGTTGTACGAACCAACGGTAAAATTGAGTGGAAGGCCCGATTTCCGAT
II	2807703	2808902	1200	2808507	238	31.9337	2.38598	29.058	TCCGTTGTTGACTTGACCGTCAAGTTGGCCAAGCCTACCAACTACGAGGACATCAAGGCCGCCATCAAGGCTGCCTCTGAGGGCCCCATGAAGGGTGTGTTGGGTTACACCGAGGACGCTGTTGTCTCCACTGACTTCTGCGGTGACAACCACTCCTCCATCTTCGATGCCTCTGCCGGTATCCAACTTTCTCCTCAATTCGTCAAGCTCGTCTCTTGGTACGATAACGAATGGGGTTACTCCCGCCGTGTCGTTGACTTGGTTGCCTACACTGCCGCCAAGGACAACTAACTAGCTAAT
II	3008527	3009007	481	3008753	254	55.6116	3.22177	52.1025	CCAATCCCATACCATTTACTAGCAATGTTTACAGCGAGCGTTTTCTAACCCCCACATCTGTACCATCTATCCCACATGCAAATAATACTACCACATATCAACTTGCTCATGTCGAAAGTGCACCAGGATGCCATGCCATGCCATGCCAATGCGCGCTACTCTGCGCTATCCTGCTCCAGTACTTACCAGCCATCTACCCTTTGCAGTACCAAAGTGGGGGAGATTGAAATTTCGCTAAGGAAAGTCGGGTAGACCCCCATGCAGCAATGAAGTGGCATACCTTTTCCCGCTAAAGTCATG
II	3155080	3155745	666	3155482	256	59.9654	3.38536	56.359	TTGCTGCTCTTTAGGAAAAGACCGTGGCCACCACACATTCACTAAGTGGGGGATAAAAGCTGCAACCGTCTATAGTTAAAGGAAGGGACAACGACCGCCACATAACTACCTGATGGGGGCAACTAACAAAGACGGGTTTTCTTCCTTCATTGCCATCCCATCTCGCTTGTTATCTAACCTTGTTTCATAATTTCTTGCAGCCAATCATTGTCATGGCGAGAACCCTTAAGACGCAACACCAACCAACCAGCTTTGACGTCACTTGATATCGCTAACCCGTTTGCGACATTTAACGAGAGC
II	3236863	3237378	516	3237242	139	21.2053	2.50358	18.8292	TAATCTACTCTCCTTTTGGAATGAGACGTATTCAATAATGAACTTGCGTCTATATAGTATATTGAGCATTGTAACAAATCCTAACATGCTTCAAGTGTTGCCGTCCGTTTTGATCTTAGCATGTTTGGTAATGACGATGGATGTTATAAGGCCCGGGTGGTTGATTTCCAAATATTATATGTTGAAAATGTGTAATGTTACAGCGAGAAGAGGATTTTGTGACCTACAATGTCATATGAGTCTAGGTCCAACTTTACGAAGGTGATAATTGTACCGAACGATTGGGTTATATGTACCATC
II	3350512	3350730	219	3350607	126	14.5985	2.16272	12.4753	AAATATTTCTAGTAATTCTCGTTTGCTTCTAAAATTCTGTAATAACTTAAAAAACATCAAATCTTTACCAATCTAAGTTAACACACAGGTCTATAATAGCTTCATGTATAACTAATTACTATTTCCTAGTAAGCTGTGACAACGTGGCCGAGTGGTTTTAAGGCGTTCGCCTGCTATTCTGTAGCCCAGCGGATTCCCTTTGGGAGCGCAGGTTCGAATCCTGCCGTTGTCGATATCTTTTTTAAGTTGCAAAGCGATTCACTATAAATTTTTGCGGTTCTATATTGGAAATCGCTATTC
II	3393566	3394015	450	3393679	126	12.4958	2.01651	10.4719	AGAAGTTGCTTAAAAGCTAGTAGATGCCATTCGTTGTTGTTTGGGGGTAGATTAAAGAATTCTAAGCTTTAGTATAAGAATAATTTGTTTCTCCTCTTTCTGCCTATCTGTTGTTCATAATCAACTGCGTAGTTCTGGTGAAGGAGTAAATTAAACTGCCTCGCACCGCCGTACTCATTTTTACCTCGAGTATGGTGGCCGTGGAATGGTGGTTTTTTATGCAGTCGGGAATGAAAGCAGCTGTAATTTCCTTGCATAATGAGCCTAAATACCTTTTTACATAGAAGTTAAAATTTATGA
II	3574070	3575100	1031	3574592	229	64.6405	3.91242	60.9354	TTGTGAATTATGCGTAGTTTACTTGTATCTATATCGTTTCAAATTTTCATACTTCAAGGATTTCCCTAAATGAATTCTTGAATCCCCCACTGAAGTCTTTTTATCCCACTTTAATTTCATACCACAGTTAAAATCATTTGCTAACCTTCTATAGCATATAAACTTATGTACCCCCAGTAAGGTCTTTTTCCCCACTTTAACTTTTAGTATTAGCTGCACCTACCAGCATATGTCCCCCACATGTGTTTTTCTTTTTACTATGAAGGTTCAATAATGGGGGTATTCAAGTCAAAATAATCT
II	3702590	3703043	454	3702858	171	33.3175	2.93173	30.4039	TGGAAAAAAATGTTTGGTAGTTGAACGAGATTGCTTCTCAACGCAATGTTTTATTTTCACTACGAAATGTTCTCATGCTTCTAATCTATGACTTCTACTTTACATGCTGTTGATTCAGGTGGTGTTTTTGTACCAAAGTGGGGGGTCTAAGTCGTTAGTACTATTGTCCTTCTTCTGGTTAGTACTGACAGTTTGTATTACATTTTAAGTGGGATCGTAGTAACTAAATGGGGGTACATAAAACTGGTACTACTAAACAGATTTATCTAAGTTGTGAACAAATTTCAATAAACAAACGAA
II	3958440	3959074	635	3958692	204	33.2829	2.64407	30.3702	CATTTAGCAGTACCCCCAAATTTCAGAAAAAATAAACAATTAGAGTATGCAATACAACTGCGCCAGTATCCACACAAAAGAACTAATCGACTACTACACCTTTCTCTACATTTTATTTCACAACTTAAAAACAACAGATTCTCATTCACGAACAATGCCTACTGCTCACATATTACATGAAAACCGAATACTGCTTAGCTCATCATCTACACACTTTTTGACTATGCACATCAAGTTATAACAATTCTCACAAACGATTCACGACAATTGTTACAAAGAAATGTACAGAAAACACGTCAG
II	3979352	3980383	1032	3979979	246	67.3634	3.8237	63.6059	TGTCTATAGTGAAATGGTATATTTTGAACTGGAAACCCCTCCCCCCACTTGATCCTATTTGGACCCACTTGGAGCCAAAAAATAGTGTATCAACGGTTTGCACTCAGGAGGAAGATCACCGTATTCTTGCTACCCCACAAAGGGATGAACACCCCACATGGAAAACTCAATACTCAGATGGTAGAACTGAGAATATATTTCAAGAGCTAGTACGAGAATACTGCCCCCCGGGAGTATGATGCCCCCACCAAAGGTTTTGGCATCCCACATCAAGGATATTAAAAGATTGACTAGTGGGAT
II	4008896	4009205	310	4009050	163	15.4827	2.00382	13.3227	CTAGTTGTAGTAATTACTACCGCTATTTTATACTTACATCTTCATCAGACTCCTCTTCTTCTTTAGCCTCTTCCTTCTGTTCTTCAGCAGCGGCTTCACCACCAGCAGCAGCGGCAGGAGCACCGGCGCCACCAGCAGCAGGAGCGGCAGCAGCAGAGCCAATGTTCAAAAGGAGTTCCTTCAAGTCCTTGCCCTCCAAAGCCTTAGCAAAGATGGTTGCCCAGATAGGCTCAACATCGACGTTGGCAGCCTTAGTCAAAGACAAGAGTTTATCTGACTAGAAATACTGTTAATAATCCC
II	4031675	4032034	360	4031789	127	15.9737	2.25124	13.7948	ATTTACTTGTTTGTATACTAAACTATTCAAATCTTCAATAATAAAAAGAGCTTATATAATTAGTTGTATATATAAAATTACCTGTGTTACCAGGTAAGCAAGAAGGTCGGGTAGCATAGTTGGTTATTGCGCACGACTGTTAATCGTGAGGTCGAGGGTTCGAGTCCCTCCCTGACCGTATTTTTTTGCATCATGAGCATCTTATACAAAGGATAGACAAACGCACATGGAGTAGTATGTAAAAGCTAAAGTTCGAATTTTGTTGTTGTTTTTGAAATCCATGTCATCATTTTACGGGCG
II	4255377	4256123	747	4255710	234	67.6711	3.99748	63.9093	TCTTCCTTTTTTATACATTGGCAGGTTGATTCGTTAGGTTATTGATTAGATTTTACTATCAACAGTTGGGACTAAGCATTCAGACGCAAAGGCATTATTAACTAAGCACAGTAACGGACTAAACTAAGTACACTTTAGTTACTGAGATTTCTTGTTGCCCCCACATAGCACTTTTAAGTGAATACACAGTCTCAAGTCTAAAATAGTCTATCCCACATCCCCCACTTAGACCCAAATATTGTGAAGGTTGACTAAACAGTTCTACTAGGTAATTATTGGTGCAAACTTTTAGATATATTT
II	4391092	4391620	529	4391255	177	26.5101	2.50476	23.9113	TCTTCCCCGGAAAGGAATGCAAAGCAATCACGAACCGCTGACTTGCCATAGTTGTGGTAAAAGCAGAAAAAACACAGCTATGTGGTTATGCGGTGTTGTAATCGAAGGCTTAAATCTTGATGGCTGGCAAAACAGTGTTTACCGTGTTTGGCTTAGCCCACTTTAACGATAATAATCTATGTGGGGAAAGACGACCTTCGTGGGGGCTTTGCTTTTTGAAATCTGCAAGTCTGTTATATTACATTAGGAGAGTGTTGCAGAATGTGTTTTGACCTAGTCATGGTTTAACCAGTACTTACG
II	4442610	4443470	861	4443045	214	35.2182	2.66202	32.2652	AAATCCTCGTATCCGTTCATCTTTTTGCTTCGGCAGTATATGCTGCCTAATAAATTTTAGCGTTCGGTAAACTGAGGTTCCTAAAATAAACTACGGTTTACGTGCATGAATGGAACATACTTGGAACCGAAATTGCTGAAGTGGCTGTTTTGTGCGGATGCCGGTTGTCAGGTCAATTCCGTGCAGAACATTCTGCTCGGTACCTGGTAGTTGTTAATTTCAAAGACCGACAATAGGAGAGGTGAGGGGAATTTTGTAGGATGGCGGCATTTCCGTTCGCCGAGTTTAATGGAAGTGGAA
II	4444207	4445970	1764	4444692	148	14.7226	2.03495	12.5938	TGTAAATGCGTCAGCCAATATTGGTAACATTTTTGGACAACTGTTATTTGGTTTTATGGGTGATTTCTTTGGCCGTAAATTTGTCTACGGTAAAGAAATGGTTATTGTTATCATCGCTACTGTTCTGGTTATCGCTATGCCTAAAAGCATTCATTCTCCTCTTTCGAAAATGATGTGGGTTTTCTGTTGGCGTTGGTTGCTCGGTGTAGGTATTGGTGGTGATTATCCAATGTCTGCCGCTATCACTTCTGAGCGTAGTAAAATTAAACGACGTGGTACACTTATTTCTTTAATTTTTGC
II	4446247	4448976	2730	4448093	173	17.4001	2.05823	15.1672	CAGTGGCCGTGTCGAGTTATTTGACATGGGACGCCAATTTTACGAGCGTTACCATGAGCTCTTTAATGCTAGTACTTACAACATTTACACTGCCGCCCAGCAGCGCGTTGTAGATTCTGCTCTTTGGTATGGATATGGTATGTTTGGTGAAGACGTTCATAATTTTACCAATTATATCCTTGTTTCAGAGAATGCTACTGCTGGATCCAATTCCTTGTCTAGTTACAACGCTTGCCCTGCTTCGGACGCGGATGATTTCACTACCCCTGCTCTCGAAGCTTGGAGAAATGTTTACATGCC
II	4449096	4449511	416	4449302	134	13.5349	2.03885	11.4609	TCTATAAAACTGTCAAATTGTCTGTCAGAAGCACAACATTAATAAGCAGTCCGCTTTCTTACTTTAAATTCGATTAAACAAATATATGCGACGAGTAGAAATAAAAGCAAACTTCAACCTTTGGTTCAACATATGCTTTCTGCCGTTGCGTGTACAAACCTATACGTGCACAACGTTGTTTAAGGTGTTTCTTTGACAATACTCTCACCATATAAAGATTACGATTTTTTTAGAAGAGATGACTAATTACGCGATACCTAAAAAATTTCACTCTAAGCGAATCTAAGATGTCCTAAGTTT
II	4531628	4539819	8192	4533916	394	42.8786	2.18218	39.7273	ATAACTATGATGAGTAGAAAATAAAGAAAATCACCGAAACACAATCAGGCAAAGAGGAATGGTAAAATAAGTGAATGAAAAGTGTGTAAAAAGGGAAGAGGTGATTGGGTCACTGGGTCAACAGGTTAAAAATAATTAAGATGAGAGGGTTCGTGGGTCATCAGGTGACGGGGTATCAGGTCAACGGGTAAAAAGGCTAGGTCATCAGGTATACAGGTTATGCGGTGTTTAGGTGACAAGGTGACAGCGGTTAGTTATGAGCTCTTGTGAGGTATCAAATGTATGGACTCGAAAGTATCA
III	71289	71710	422	71450	135	16.0027	2.19395	13.8228	TTCCCAAAATAGGATATCCACGGTGCTTCCCTAATTAAGCTTTCCGTAGTGCGGAGTATTTTACCATATATCAGTCATTAGTTGTACGGCTACTGTACTAGCTCACATGGTCCAGTGGTTAAGACTCATCGTTGTGGCCGATGCGACCCAGGTTCGATTCCTGGTGTGGGCAGTTTATTTATTTGTTCTTTTTTAAATTATTAATTACTTGTATAAATAGGAAATAATCAGCGAGAGCAAATAGTACAATTCAGTTATGGCAAGTACAAAAACGCAAAGATAAATGCAAACGTAGAAACC
III	268007	269425	1419	268589	255	47.038	2.87081	43.7703	GTGGTTAAGAATGATGACTTGAGCGGTGAAGCTAGCACAACCCATGGGAGGATCGTTCTTGGAGTCACCACAGACGTTACCACGGCGAATATCCTTGACGGAAACGTTCTTAACGTTGAAACCAACGTTGTCACCGGGAAGACCAGCGTCGAGAGACTCGTGGTGCATCTCAACAGACTTGACTTCGGTAGTGACACCAGCGGGAGCGAAGGTGACAATCATACCGGGCTTGATAACACCAGTCTCAACACGACCGACGGGAACTGTACCAATACCACCGATCTTGTAAACATCTTGAAG
III	611782	612453	672	612110	174	16.4683	2.00611	14.271	CCAGCCCTTCTTCAACAAAGAAACCAAGAAGTTGACGGCAAGCATGATGTTAGCAATCAATTGCTCCTCAGACATCTCGACATGGCCGACAGCAACACCAAGGCAAAGGACCTTCTTCAATTGGAACTTGATAGTGGACTTAACCTCGGTGATTTTACCGTAAAGGTCGTCAGCATGGGAGACAGGGGAAGGGAACTTACCAGCCTTGGAAAGACCGGGACCCAACAGACGAGGAATTTGCTTGATGAGGACTTCAGAAGCAATGAAAGCATCATACTTCTTGGCCAACTTCTTGACAAG
III	925694	926548	855	926218	138	13.5521	2.01716	11.4772	TCCACAAATGAATTTCATCGACTACATTAACTACTCCTGATTTACATTATATATTACTAAATTACTAACTGTGTGTCTACGGCCATACCTAGGCGAAAACACCAGTTCCCGTCCGATCACTGCAGTTAAGCGTCTGAGGGCCTCGTTAGTACTATGGTTGGAGACAACATGGGAATCCGGGGTGCTGTAGGCTCCTTCTTTTTTATTTACTATTTGCTTGGCTTCTGCAGTTAACAATTAGGAAGATGTACATATACATAACAAGTTTGAAAGCACTTATCGAGATGATTTGCAATTACG
III	974410	974746	337	974565	153	16.6206	2.11884	14.4174	TCATCTTATTATGCAATAAAACACAACACCGCATACTAAATTTTGCCGGATCGTTTTTACATAACGCTTCCACAACCGCAACGATTAAAAAGCACACCCAATGAGCATCCGTCCAAGCCCAGCTTAAAAATGAAAAAAACCGGACCTAAACAAAAGACGTTTCGTGCAACTCACTCAATCACAGTTAATTAAAGCCAAATATTTCGCCCTTTCTGACATCCTCGCGCTTTGCAAATGTCAGCAAAACAATGGACACAATACTTCGGCCTCTGACTAAAGGAAATCATCAGAAGCCTGTGC
III	975046	976654	1609	975814	193	20.0122	2.09451	17.6756	ATCCAACACCAAAAACTTAATGTTGGCCAAAGAAATACGACCACGATCGATTAAATCAACCAAACGACCAGGAGTAGCAGAAAGCAAGTCGCAACCTTGGTCAATTTGGCGGATTTGAGCACGAATATCGGCACCACCGTAAACAGCACAGGGACGCACCCAAGAACGGTAACAGAATTTACGAGATTCCTCATGAATTTGACAAACTAATTCACGAGTGGGAGCCAAAATAAGGGTGGTAGGATAGGCTTTGCGAGGACGATAACCCATACCGGCATCCTGATCAACAGGAACAGCGGC
III	1065019	1065380	362	1065112	104	12.3928	2.16815	10.3735	TTTATTTTCGTTCGTATGTTAGTACGAATATCAAATTTCCAGTTTCATATTGCGTGACCAACACATTATTTATTAAAAATTTTGGACAAGCCAGAACTCGAATCTGGGACCTCTTCCATGCTAAGGAAGCGTGATAACCATCTACACCACATGCCCATGGTTGATTTTTACTCTATGTTAGTCGATTATTACTTCCTTTACTATTTGCTATTATTCTTTTCCAACGCACTTTGATACTACCCACGCTTATCATAGTATACAAATATAACATACATACAAATACAACATACATACATATAT
III	1065719	1066029	311	1065854	108	11.5498	2.06674	9.57423	AAAAGAATCGTTAATTAATAAAGCAGATATAATTTCTTTTTTAAAAGTAAAAAAATTAAAAACTAAAAAACGATTGATCGTGCCAAGACTCGAACTTGGGACCGTCTGCGAACTGTAAATGTTAAGCAGAAATTATAACCATCTAAACCACACGACCAGATGTTAGCCTAACTCTTATTATATCTGGTATAAGCGTAGTTTAATAACTGGCTAATTGAGTAATGAAGAGCCACAGATTTCGCAACCTTCACAAATGCTTTACGCTACCTCGTTAATTAAAAAGCTAGACCACTTACCATA
III	1066469	1066844	376	1066667	122	14.9634	2.21882	12.8239	GTCAAGCAGAGGAAATATACATAATGTGGTACCTTATCAGTTTAAGTAATATGCATATATGACTAAGTTATTATACCCTATTACTTCATGTATAACTTTGAATTTACAAAGGACACTATGCCTGAGTGGTTAAAGGGACAGACTAGAAATCTGTTGCGGTCTCCGCGCGCAGGTTCAAATCCTGCTGGTGTCGTATTTTTGCTGTTATCCATCCACTTACGGTAAAGTTACCTAATACCATATTTAGATCATGACGGAATTTTTGTATTTTAGTATGATCTATATTCTTCGTTGTGGATA
III	1067793	1068457	665	1068177	131	26.7054	2.98259	24.0965	TGTCTCCTTTAGTATAGGGGTAGTACACAAGCCTGTCACGCTTGCAGCCCGGGTTCGAATCCCGGAGGGAGAGGATTCTTTTACGTTTTTTTTCACATGTTTTGTGACTTTACTTAACCAAAATACCAAAAATTTTGATTTAGTGCTAAAAAGGTCGATCCCGCCAGGAGTCGAACCTGGAATCTCTTGATCCGTAGTCAAGCGCCTTAACCATTGGGCCACGAGACCTTATTGTAATCTTTCTCAATCAAGAACATTTTATTTATTTGAATTAATTGAAAATATTTTGCTATCATTGAA
III	1068803	1069846	1044	1069178	119	20.6962	2.68012	18.3362	CGATGATATTAGATAGTAAACTCTTAGTTTATCCATGGCATCCCGATATGAAATTTCTTGTTTCAATAAATGCAAACGTATATTAGTTGATTATTCGAAAAAGCTATGTTTTATTTTTTCAGATTTATTTCCGAAAGCGGAAGGGTGTCCGAGTGGTTATGGAGCTAGTTTAAGGCACTAGTGCGAAAGCTCGTGGGTTCGAGTCCCACCCCTTTCAGTACTGAAAATTTTTGGAGTTTTTTATATTTTTAAAAATAAAGCATGGTAAATTTTTCTAAACAAGCGTACTTGACATGCGGT
III	1070290	1072163	1874	1071137	129	21.1073	2.59597	18.7344	TAGTAACTTTTATGATCATTGTTGACTTCTTTCTATGACGTAATATGTGTCCTAAAAAAAGGTAATAAATATAAATTGTTCTATGTATACTCTCAGCTAAAACCCGTCCCGAGTGGCTCAATCGGTTTAGAGCGTCTGACTCTTATGATGGTCATCAGAAGGTTGCGAGTTCGAGTCTCGCCTTGGGAGTTTAGTAATCCTAGTATTGGGATTTAAATTATTTTTTATTCTGATTGAATAGTTCTAAAACCTAACGCTTTTTAACAATTTTTATTCTAATGAAAACACCCGAAGGGTGTT
III	1082083	1082406	324	1082215	166	15.9295	2.01395	13.752	TAGTCACAAATGTACATACGTTGAAACATTTGAACAACGTACAACAAGCCAATAATGACAAGAATGGAGATGAAAGTGGTGATGGTTAGTGGTAGTCGTGGTAGTAATGGAAGTGGTAAGTGGAAGTGGTGGTGGTGGTGGTAGTGCTTGTGGTAAGTGGAAGTGGTAGTGGTAGTGGTGCTGTGCTGATGCTGGCGCCGATACTGGTGATGATGTTGATGCCTATACTGACACTAGTACTGACACTAGATGACACTAGTACTGGTACTAATGGTACCATTCAACTTGGCAAGTATAAGA
III	1083977	1084488	512	1084160	168	17.8581	2.10653	15.6075	ACAAGAATGGAGATGAAAGTGGTGATGGTTAGTGGTAGTCGTGGTAGTAATGGAAGTGGTAAGTGGAAGTGGTAAGTGGAAGTGGTAAGTGGAAGTGGTAAGTGGAAGTGGTAAGTGGAAGTGGTAAGTGGAAGTGGTAAGTGGAAGTGGTAAGTGGAAGTGGTGGTGGTGGTGGTAGTGCTTGTGGTAAGTGTAAGTGGTAAGTGGAAGTGGTAGTGGTAGTGGTGCTGTGCTGATGCTGGCGCCGATACTGGTGATGATGTTGATGCCTATACTGACACTAGTACTGACACTAGATGA
III	1086442	1086912	471	1086774	150	15.8361	2.08996	13.6625	GAAGTAACATTGTTTAAAAAGAATTGGTCGAAAGCATCAAGACTATCAAGCTTAAATACATTCAGTAACGAAATTAGTCATATAAAGTCTTTCGTAATACACAAATTTTTTAGCGCACACGTTATTCCTGCTTAAAGCTCGTTTCTCTTCATCCATTTTACACAGATAGTGTGATCACGAAGAATTACTAATAAAACATTGAGGCGTTATGAGATCTATGTCGCTTCGCAAAACCGTATCTTAGTACGACATAAAGTTGCTTTTGGACTTGAACGTTGACTAAATAAATGTGTTGCCTGA
III	1088896	1090458	1563	1090024	161	28.1927	2.73266	25.4716	ATCCAATTGCTAGTGCAGTAATAGTTGCTTGAATTTTCACCGGATGAATCTTCTCTTGAATAAAACCGCCAATAAGAGCTAGTCAAGTTGACTACTGAAAATATACGATATTGAAGATGGCGTATGTAGTGCTTGTAATGGTCTGGTGGATGGTGGAAGCTTTCCACTCTTACTTAGCATTCAGTATTACACAAATGGATTAAGGAGAAGCGGTAAACGATTTCATGAGGTTCGTTTATTATAATGGGTTGAGTGACACGATTCAAATTGAGTCAAAATATTTTTCGAAGATAATCCGCC
III	1091527	1094896	3370	1092490	191	32.0412	2.68143	29.1627	ACAGCTGAAAAGAAATATATTAAAGATAGTTATTTAATAGAGGTTTAAATATAGTTAGTCTTATAATTAGGTTAGTTGATGGAGAAAATCAAACAAATCTCCTTTAGTATAGGGGTAGTACACAAGCCTGTCACGCTTGCAGCCCGGGTTCGAATCCCGGAGGGAGAGGATTCTTTTACGATTTTTCCACATGTTTTTGTTTTGTGACTTTACTTAACCAAAATACCAAAAATTTTGATTTAGTGCAAAAAAGATCGATCCCGCCAGGAGTCGAACCTGGAATCTCTTGATCCGTAGTCA
III	1095065	1101932	6868	1096149	146	32.866	3.21427	29.9641	AAAGTAAAGGACAGATAAAGCGGAGACGTAATAAATAAAAGTACCTCTTGTATGTAAAAACATGTACAATAAAATAGTAAAAATGGTGACCAGTGAGGGATTCGAACCCTCGCATCTTTCGATACAGCAAGACTATCGTCCAAGTATTACTTGAGTGCTGCGCCATAGACCGCTCGGCCAACTGGCCATGTTGTTATTCGTGTGTCATATATAAGCATATTATTCTTACTTCGCAAAAAATAATTTGATTTAAGCTCACCTATTATTCTGATGTAAATATTTATTAGTCATTAGTAAAGA
III	1102059	1103428	1370	1102888	144	17.7805	2.24468	15.533	TGAGCTTAAATCAAATTATTTTTTGCGAAGTAAGAATAATATGCTTATATATGACACACGAATAACAACATGGCCAGTTGGCCGAGCGGTCTATGGCGCAGCACTCAAGTAATACTTGGACGATAGTCTTGCTGTATCGAAAGATGCGAGGGTTCGAATCCCTCACTGGTCACCATTTTTACTATTTTATTGTACATGTTTTTACATACAAGAGGTACTTTTATTTATTACGTCTCCGCTTTATCTGTCCTTTACTTTTGATTCATCGGTATCGTTCCTATCTTTCAATACGCTTTCCTT
III	1103572	1105218	1647	1104437	115	21.0988	2.76448	18.7261	TGCATATTAACTAGTGGTGAGTGAGTGAGTTAATAAACCAACATAAAAGTTTGATGTAGAACCTGCAAAGTTCAAACAGCAAAATAAATAAATGGATTACACTCAGAAGTCAAACAATGAAGTACGTGTATTTTTTGAAATCGTATATGACTGCGTAATGATGGTACTTGATTTAAGATGTAGTTTCAGCTACTCAATGCTATTTTTAGAAGATAAGTCACTAGCTATCCTTAGGACAAGTAATACTAATTCTTTCCACAAAACGATTACTAATGATATTAGAATTAATGTTTCGTTTTG
III	1105390	1107018	1629	1105792	152	29.8442	2.93098	27.0317	GGGTTATCCACGATTGCTTTGTAACCACCAAGGACATTGCCAGTATTTTTCTGGTGCTCCTCGAGATATTCTCTCTCGCGTTGCTTGGTCTCTTCAAAGACGTTGGGAGTTATGAAGTGCAGACTTATGACCATTGATCATGTTTCCAGGATTATGCTTTTAAATATAGATAACGTTAATTTACGAAGACAAACAGCAGCTCTTGTAGCTCAGTGGTAGAGCGCTTGCCTAGTAAGCAAGAGGCCCAGTGTTCAAGTCACTGCTGGAGCAATTTTTTTCATTTTTAATTTATTATACATA
III	1112373	1112617	245	1112504	140	21.8022	2.53368	19.4074	GTAGTAGAAGGGTAAGAATATGTAGGATGAAAACAGATTCCGGAAGCTGCATATGTGAGCAGACACAGGTATTTTGAACTGCCTTCAAGTCTCTTAATAAGTAAGGAAGTCGCTATTATTGGATTAGTAGACCCACATCACCAAAATTTCTTGCCATGACGACATCACGTGTACTAGAGCAATTCGGGTCATACTTCGTGTTCAATTCTGGTTTGATTTCTTTTTTTTCGAGTATGATTGTCAACAAAAAACGATAAAGACTTTTACATCTCCAGTCAGCTGAACTCCAGTAATTAAAGT
III	1114603	1114828	226	1114700	101	11.0358	2.07845	9.08824	TGGAGTTTACTCATTGATTTTTTACCACTTACACACATAAGTCTTATACTTGCCAAGTTGAATGGTACCATTAGTACCAGTACTAGTGTCATCTAGTGTCAGTACTAGTGTCAGTATAGGCATCAACATCATCACCAGTATCGGCGCCAGCATCAGCACAGCACCACTACCACTACCACTTCCACTTACCACTTACACTTACCACAAGCACTACCACCACCACCACCACTTCCACTTACCACTTCCACTTACCACTTCCACTTACCACTTCCACTTACCACTTCCACTTACCACTTCCAC
III	1115854	1116949	1096	1116857	94	10.9316	2.12945	8.9897	TTCTTCCAATTGATCAATACAGTAACTTTAGAACTATCATCGCTATGCCTTTAAATGACCGCACTAAAAGCATGGTACCGAAGCACTGACATAACAGAGAGGTTCAGAAAGGAATTTAAAGATTGACTTTTTCGATAAACTTCATGTTACAAGTCTTATCGTTTGTGTTTATAAATCATCAGCCTCTCTCTATATCTCTATATCTCTATATCTCTATATATCAGATATAAAGATGCGAGTTTTGAAGTAGACATTCCGCACAAAGTCTAGTACACCATGTCTCTTGTGCTCAGGCTGGTT
III	1118148	1118794	647	1118614	98	12.2468	2.21056	10.235	ATGAGTTGAGCTGCTAGTTTAGGCGTGCGTTGACCTTTTAGCTTAGGTGTATTGTCACGGTTTGGTTTTCATATCTCTGCGCCGCCTATATTAGCAAACAGTTGACATAGAATTCACAACAATAACAAATTAAAAATGCATCATCCTGTAATTAAAAGAAGGTATATTGATGCATCCTTTGCGTGAATCAGACACGTAGAATCATGTTTCTCTCATGACAAAGAGCACTTATAGTAGCATATCTAGAATTTTTCTCTCAGTTTTAACTTTCTTCGGTCTCGGTTTTTCCCTTGACAAAGC
III	1119110	1119390	281	1119277	139	23.8714	2.68194	21.401	AAGAATATGTAGGATGAAAACAGATTCCGGAAGCTGCATATGTGAGCAGACACAGGTATTTTGAACTGCCTTCAAGTCTCTTAATAAGTAAGGAAGTCGCTATTATTGGATTAGTAGACCCACATCACCAAAATTTCTTGCCATGACGACATCACGTGTACTAGAGCAATTCGGGTCATACTTCGTGTTCAATTCTGGTTTGATTTCTTTTTTTTCGAGTATGATTGTCAACAAAAAACGATAAAGACTTTTACATCTCCAGTCAGCTGAACTCCAGTAATTAAAGTTCGATATTGTTTA
III	1119581	1119987	407	1119686	121	12.6706	2.06055	10.6377	CAACTATAAAGTTTTTCAGCGAGACATGTACCGATTGATTCGGTCTTTGCAGGACTCTTGATGTTTGCCTAATCGGGTTAAATTGTGGTGGTGTGGTAATACGTACTAGCTCTCGTTTCTTTATATCCAACTGACGGCATCGCTTGTACTTTTTTAATAACTTCTTTTTCCTCTTCGTATGGTGTGTAAACTGAATGGAAACGATGAACCCATCATGAACCTCACATCATTTGGTTCCGTCTATTTAGTGCTCACCCAGTGTTGCTTTATGAAATGAAACAATGGTTGATGTTTTCATCA
III	1120829	1121215	387	1121074	91	9.99933	2.0697	8.11111	AAAAAACTCCCATAAAATGATTAAATCACATTCATTGCAATAGGAAACTGTATTCGGTATATACAATCGGTATTGCATGTTGTACCAAGTATAATATAGTGATGAGATTTTGAAGTTTGTGTTCTATTACCACATGGACCTACGTCAGGAGTGGAGACCATAATCATTGTAAGTATGTTGAAAAACTTTATCCAAAGGGTAAAAACTCAGTCCTTCGAATTATAAATCGGACCAGAGTTGCCGCAATTGAAACGAATTAGATAAGTGAACAGGACATGCTTAGCAAGTACAAACCAGTAT
III	1121311	1121550	240	1121431	105	12.7453	2.1888	10.7086	GAATCAACGGAGTTGTGAAATTTTCTTAGTGGAGTTTACTCATTGATTTTTTACCACTTACACACATAAGTCTTATACTTGCCAAGTTGAATGGTACCATTAGTACCAGTACTAGTGTCATCTAGTGTCAGTACTAGTGTCAGTATAGGCATCAACATCATCACCAGTATCGGCGCCAGCATCAGCACAGCACCACTACCACTACCACTTCCACTTACCACTTACACTTACCACAAGCACTACCACCACCACCACCACTTCCACTTACCACTTCCACTTACCACTTCCACTTACCACTTC
III	1121708	1122062	355	1121783	110	11.2189	2.02599	9.2615	CACTTACCACTTCCACTTACCACTTCCATTACTACCACGACTACCACTAACCATCACCACTTTCATCTCCATTCTTGTCATTATTGGCTTGTTGTACGTTGTTCAAATGTTTCAACGTATGTACATTTGTGACTACGATTTCTTGTTAGCGATATAAACGAAGAGGATAAAGACTTTGGAGTAAATAATTTTGGCCGTGCCACTAGCATAATGTATTTGTGCGTCTAGGTATCCTTAGCGTTGCAAGTGGAAAGTGGCTTCACACTATAAATGGTTGACACAGCTAATACATTAGACATA
III	1122214	1122997	784	1122351	113	12.8483	2.13106	10.8069	CCATCATGTACGACCAATCACACTTCCTATAGCTGAAACCGAGTGCAAATGCTTTTGTAGCAATCATGATCTGTGCCTTTCCAAGTTAGGGGTTCCAAGACTCGTCAAAGTGAATTTTTCATTCTTCTTCATTTAAATCTCTCGTGTAAATGGTTATCAAGATGTGATGAGAGAACAAGTCAGGGTGGTCGAAAAGGATGCTTAATTAATGTACGGTGAACGTTTCATGTTTATTCATTGAATCACCTTTCCAAAGTCTATTATTTTGTTTTTATCAACATTCGAAAATTCAAGGGAAAG
III	1123124	1123752	629	1123609	102	14.6641	2.38186	12.5379	TTTGGATGTTCTTCCAATTGATCAATACAGTAACTTTAGAACTATCATCGCTATGCCTTTAAATGACCGCACTAAAAGCATGGTACCGAAGCACTGACATAACAGAGAGGTTCAGAAAGGAATTTAAAGATTGACTTTTTCGATAAACTTCATGTTACAAGTCTTATCGTTTGTGTTTATAAATCATCAGCCTCTCTCTATATCTCTATATCTCTATATCTCTATATATCAGATATAAAGATGCGAGTTTTGAAGTAGACATTCCGCACAAAGTCTAGTACACCATGTCTCTTGTGCTCA
III	1124959	1125504	546	1125389	95	11.3926	2.16231	9.42587	AGTTTAGGCGTGCGTTGACCTTTTAGCTTAGGTGTATTGTCACGGTTTGGTTTTCATATCTCTGCGCCGCCTATATTAGCAAACAGTTGACATAGAATTCACAACAATAACAAATTAAAAATGCATCATCCTGTAATTAAAAGAAGGTATATTGATGCATCCTTTGCGTGAATCAGACACGTAGAATCATGTTTCTCTCATGACAAAGAGCACTTATAGTAGCATATCTAGAATTTTTCTCTCAGTTTTAACTTTCTTCGGTCTCGGTTTTTCCCTTGACAAAGCTGATAATATATCATG
III	1128069	1128380	312	1128210	115	16.5525	2.40064	14.3518	ATTTTCTTAGTGGAGTTTACTCATTGATTTTTTACCACTTACACACATAAGTCTTATACTTGCCAAGTTGAATGGTACCATTAGTACCAGTACTAGTGTCATCTAGTGTCAGTACTAGTGTCAGTATAGGCATCAACATCATCACCAGTATCGGCGCCAGCATCAGCACAGCACCACTACCACTACCACTTCCACTTACCACTTACACTTACCACAAGCACTACCACCACCACCACCACTTCCACTTACCACTTCCACTTACCACTTCCACTTACCACTTCCACTTACCACTTCCACTTA
III	1131846	1132297	452	1132159	97	11.7604	2.17671	9.77397	TGCGTTGACCTTTTAGCTTAGGTGTATTGTCACGGTTTGGTTTTCATATCTCTGCGCCGCCTATATTAGCAAACAGTTGACATAGAATTCACAACAATAACAAATTAAAAATGCATCATCCTGTAATTAAAAGAAGGTATATTGATGCATCCTTTGCGTGAATCAGACACGTAGAATCATGTTTCTCTCATGACAAAGAGCACTTATAGTAGCATATCTAGAATTTTTCTCTCAGTTTTAACTTTCTTCGGTCTCGGTTTTTCCCTTGACAAAGCTGATAATATATCATGTACAATCAGG
III	1132684	1132915	232	1132805	125	15.1451	2.20852	12.9983	GTAGGATGAAAACAGATTCCGGAAGCTGCATATGTGAGCAGACACAGGTATTTTGAACTGCCTTCAAGTCTCTTAATAAGTAAGGAAGTCGCTATTATTGGATTAGTAGACCCACATCACCAAAATTTCTTGCCATGACGACATCACGTGTACTAGAGCAATTCGGGTCATACTTCGTGTTCAATTCTGGTTTGATTTCTTTTTTTTCGAGTATGATTGTCAACAAAAAACGATAAAGACTTTTACATCTCCAGTCAGCTGAACTCCAGTAATTAAAGTTCGATATTGTTTAAAAATTAA
III	1133984	1134220	237	1134110	97	10.581	2.07156	8.65837	ATACATTGGGTTTAAACTCTGATTTGTAAATTTATTTTTATTTTTATTCTTATTTATTTTGTCACATCTTTACTTGAGTGTTCATGCGACATTTGGAAAAACGGTGCAATTGAGCAAGGCTGAATTACTTATTTTTACATTTATTGACCACTTTTATTGAAGCTAAGCTATATAATGAATGCAACGGTTATGTGAGATTGAGTAAGAAGTGTTATGGAATAAGCAAAGTTAAATCAGTAGCTTTAATTTTTTGTTGTTTTTAATTTTAATTTGCAAACAAACAAACAAAAACGTATTCAT
III	1134889	1135090	202	1135020	100	11.5611	2.13206	9.58499	GTCTTATACTTGCCAAGTTGAATGGTACCATTAGTACCAGTACTAGTGTCATCTAGTGTCAGTACTAGTGTCAGTATAGGCATCAACATCATCACCAGTATCGGCGCCAGCATCAGCACAGCACCACTACCACTACCACTTCCACTTACCACTTACACTTACCACAAGCACTACCACCACCACCACCACTTCCACTTACCACTTCCACTTACCACTTCCACTTACCACTTCCACTTACCACTTCCACTTACCACTTCCACTTACCACTTCCACTTACCACTTCCACTTACCACTTCCACT
III	1138785	1141049	2265	1139661	125	19.0752	2.49037	16.7751	AAATCCCAATACTAGGATTACTAAACTCCCAAGGCGAGACTCGAACTCGCAACCTTCTGATGACCATCATAAGAGTCAGACGCTCTAAACCGATTGAGCCACTCGGGACGGGTTTTAGCTGAGAGTATACATAGAACAATTTATATTTATTACCTTTTTTTAGGACACATATTACGTCATAGAAAGAAGTCAACAATGATCATAAAAGTTACTATAATTTTTAACAAGCAATGGCTTTAAAATAAAATAATCAGGTAGTTGACGATGGAATATGTCCTTTACAAAGAAATAGTGATGTCT
III	1412068	1413435	1368	1412329	205	37.9241	2.85546	34.9183	TATAGGGAAAAGGAGACATAGGAGCGCGCACCCTTCATATATATACTAATTCTAATCTTCCGTATAAGCACGTCTAACGCGTTCTTGTAGATGACGTTTCCGCGTCGCATGGCTAAACACCAGGGTTAGGGTTGTGATGCCCAAGTTGTATATAACCATCGCGTCGCCTGCAGGCATGTTAGTTAATACCAACAACTTGATATTGCACGAAAGTTTAGGATTATCAAATTCCTACAATTGCAATTACTTAGTTCAGTCCATCAATTTTGAGATTCTCTCGACAACCAATTTTTAAATCGT
III	1451902	1452779	878	1452380	201	31.6184	2.58739	28.7496	TTAAATCTTTGCTTATGATTAGCTCTATGTCACCCCTGTATTTTGCTTGTGGTTCGTATGATTCTGTACAGCTCATCGATGAAGGGTAGTGGAGTCTTGTAGATATTGGGTACTACTGACGATAGTATCCCGAAGCAGTTTTGACCTTTCGACGGCAATTGTAGTTTGCATCAATAGCGATTCGAGTGGATGGATCGCCTATTATTGTGAGTTGTTTATTAGATGATGTACAGTTCGCATTAAAGATAGGCGGTATGTGTCGTGAAATGTGCGGAAGTTTGTGGAATTTCATGTTTAAAG
III	1591378	1592784	1407	1591914	263	34.5764	2.368	31.6349	GCCACCCATGCTACCATCATCCCCGAGTCCGTTCCCCTCGAGGTTGCTGCTCCCATCATGTGCGCTGGTATCACTTGCTATCGTGCCTTGAAGGAATCCAAGGTCGGCCCTGGTGAGTGGATCTGCATTCCCGGTGCCGGTGGTGGTCTTGGCCATCTTGCCGTCCAATACGCCAAGGCTATGGCTATGCGTGTTGTTGCCATTGATACTGGTGATGACAAGGCTGAGCTCGTCAAGTCCTTTGGTGCTGAGGTCTTCCTTGACTTCAAGAAGGAAGCCGACATGATTGAGGCTGTCAAG
III	1838010	1839640	1631	1838863	189	23.1614	2.26192	20.7194	GTCACCAGTTTTGGATCTTTGTTAAATGAGCCTTTCACTGGCTTAATTACTTTGAAGGGTAATGGCATCAACGACTTCAAGGACATTAAAGGAAAGCGTATTGGCTACGTTGGTGAGTTTGGAAAGATCCAACTCGATGACTTGTGCAGCAAGTTCGGTTTGTCTCCTTCTGATTATACTGCTATTCGCTGTGGTATGAACATTGCCCCTGCCATCATCAATGGTGAAATCGATGGCGGCATTGGCATTGAATGCATGCAACAAGTCGAGCTTGAGCGCTGGTGCGTCTCCCAAGGCCGC
III	2057285	2059228	1944	2058124	227	27.0326	2.24477	24.4034	GCGCAAGAACAAGAAGGATATCACCGGTAACGCTCGTGCTGTCCGTCGTCTTCGTACCGCTTGTGAGCGTGCTAAGCGTACTCTTTCTTCTTCTGCTCAAGCTAGCATTGAGATTGACTCTTTGTTCGAGGGTATTGACTTCTACACCTCCATTACTCGTGCCCGTTTTGAGGAGCTTTGCGCCGATCTCTTCCGTAAAACCATGGAGCCCGTCGAGCGTGTTCTCCGTGACTCCAAGGTCGACAAGGCCTCCGTCAACGAGATTGTTTTAGTCGGTGGTTCCACCCGTATTCCCCGTGT
III	2095159	2096008	850	2095457	195	19.1129	2.04472	16.8112	AGTTAGGGGTGAGGATACCGTAGGTAAGAGAAGCAGCGGCAAAGGCAGCCTTAACAAAGTTACCCAAAGTCTTGGTGGAACCACGAGATTGGGTGTAGCAATCTTCGATACCAGCGAGTTGAAGGAAACGCTTGGTAACGGGAGCAGCAACAAGACCAGCACCACGGGGAGCAGGGACGAGACGAACAGTAACGGAACCGCACTTGCCAGAAACCTTGACGGGGACAGTGTGAGGATCACCCAAAGCAGTACCCCAGTAACCACGACGAATAGGCATGATGGAAAGCTTGCCCATGATGA
III	2309560	2310133	574	2309829	318	97.7938	4.26258	93.4382	GATTCACCCTTTATTCGATTTCTCAGTATTGTTTTCTTTGCCTGGCTGGCTTACCTTTTCCCGTAGATGCCAGCCATCTTGGTAAATGTACATCCCCCACATAGACCCATGTCCCCCAGTCGACTGCAAACATGAACCACTTTGCTACTAGCTAAAAGGAACTGACTACAACTTTGAAAAAGTTCCTATGTGGGGGTGAGGGGGGAAAGAAAAATGCGGAGGAAGTGTTTCGGGAATACCGTGTTTCTGCCGAAGTCTTTGCCGGTCGTGGACCGGGTGTCCGAGGAATTCCCTCATGAC
MTR	9885	10160	276	10021	98	10.6258	2.06727	8.70045	AAGAATTGGTCGAAAGCATCAAGACTATCAAGCTTAAATACATTCAGTAACGAAATTAGTCATATAAAGTCTTTCGTAATACACAAATTTTTTAGCGCACACGTTATTCCTGCTTAAAGCTCGTTTCTCTTCATCCATTTTACACAGATAGTGTGATCACGAAGAATTACTAATAAAACATTGAGGCGTTATGAGATCTATGTCGCTTCGCAAAACCGTATCTTAGTACGACATAAAGTTGCTTTCGGACTTGAACGTTGACTAAATAAATGTGTTGCCTGATTGTACATGATATATTAT
MTR	11275	11534	260	11430	66	13.9187	2.90077	11.8264	ATGAAATCTCTACCTGCTTTGCACCCTAAATATAACGTGTCGTCTTGTAGCTGCATGTGAATTACAACGATTGATAGATGAAAAACAAATCGACTTGTTGTCCATTTCATCGTTTCAAACGACTGGTAGTGTTGCTTGTGTCCATATCCATACTATGTCCGTGTGTTTTGCTTTATTACACTTGGTCAAAGAAATCTATATGATGTTCTTTACGAAACCCACAAAGTCATTAGGGATATCATCCGAACAGAAGGGTATATATGCAAAATACACTGCAAGGACTAAGCCCAAGCACCGTAT
MTR	12560	12779	220	12628	95	17.7641	2.76348	15.5175	CCGTATCGTGTTTTTTCCAATTGTGATCTTCCAATGCTTAATAAATACGAAATCTTATTTCGATTTACAGGCTGGGCATTCACGAAACATAGCGTTTTTACATTTCTACAGGCACACCATAAACAACTTGCAATATCTGCCATCACTTTATTTCTCCAACTTTGTTCAAGTTAAAAGTGGCAGAAAGTGTTTCCCGATATGAGATAACCCAACGCATATGTTGTTGCAAAAACTAAACGCCCATTCATCAAACGAGTCGAGATGAGAGGAATCATTGTATAAAAGGCTAGCATGTAAAAG
